# Supplementary material for: Transcriptome Analysis Reveals the Stress Tolerance to and Accumulation Mechanisms of Cadmium in Paspalum vaginatum Swartz
Source: MDPI journal article supplement (doi:10.3390/plants11162078), 2022-08-09
Supplement: s1 [file s1]

**Table S1.** Graphs present 17 KEGG pathways with the highest transcriptional variations, out of the down-regulated DEGs in *Paspalum vaginatum*

| Term Name                                        | MainClass         | GeneHitsInSelectedSet | p-value  | enrichFactor | GeneListInSelectedSets                                                                                                                                                                                                                                                                                                                                                                                                                                                                                                                                                                                                                                                                                                                                                                                   |
|--------------------------------------------------|-------------------|-----------------------|----------|--------------|----------------------------------------------------------------------------------------------------------------------------------------------------------------------------------------------------------------------------------------------------------------------------------------------------------------------------------------------------------------------------------------------------------------------------------------------------------------------------------------------------------------------------------------------------------------------------------------------------------------------------------------------------------------------------------------------------------------------------------------------------------------------------------------------------------|
| 00280 Valine, leucine and isoleucine degradation | A09100 Metabolism | 28                    | 5.86E-07 | 2.806163     | TRINITY_DN127_c0_g2_i1_6, TRINITY_DN37349_c0_g1_i1_6, TRINITY_DN35781_c0_g1_i1_4, TRINITY_DN5569_c0_g2_i1_4, TRINITY_DN32766_c0_g1_i1_4, TRINITY_DN31880_c0_g1_i1_4, TRINITY_DN36297_c0_g1_i1_4, TRINITY_DN30746_c0_g1_i1_4, TRINITY_DN36089_c0_g1_i1_4, TRINITY_DN29435_c0_g1_i1_6, TRINITY_DN37543_c0_g1_i1_6, TRINITY_DN27651_c0_g1_i1_6, TRINITY_DN36033_c0_g1_i1_4, TRINITY_DN37346_c0_g1_i1_4, TRINITY_DN27451_c0_g1_i1_4, TRINITY_DN38780_c0_g1_i1_6, TRINITY_DN31588_c0_g1_i1_4, TRINITY_DN28649_c0_g1_i1_4, TRINITY_DN26605_c0_g1_i1_4, TRINITY_DN31675_c0_g1_i1_6, TRINITY_DN7306_c0_g1_i1_4, TRINITY_DN5158_c0_g2_i1_4, TRINITY_DN33593_c0_g1_i1_4, TRINITY_DN34083_c0_g1_i1_4, TRINITY_DN4679_c0_g1_i1_6, TRINITY_DN26364_c0_g1_i1_4, TRINITY_DN34962_c0_g1_i1_4, TRINITY_DN34394_c0_g1_i1_4 |

|                                                     |                               |     |          |          |  |                                                                                                                                                                                                                                                                                                                                                                                                                                                                                                                                                                                                                                                                                                                                                                                    |
|-----------------------------------------------------|-------------------------------|-----|----------|----------|--|------------------------------------------------------------------------------------------------------------------------------------------------------------------------------------------------------------------------------------------------------------------------------------------------------------------------------------------------------------------------------------------------------------------------------------------------------------------------------------------------------------------------------------------------------------------------------------------------------------------------------------------------------------------------------------------------------------------------------------------------------------------------------------|
|                                                     |                               |     |          |          |  | TRINITY_DN30255_c0_g1_i1_4,<br>TRINITY_DN25720_c0_g2_i1_4,<br>TRINITY_DN32182_c0_g1_i1_4,<br>TRINITY_DN26817_c0_g1_i1_4,<br>TRINITY_DN35285_c0_g1_i1_4,<br>TRINITY_DN36276_c0_g1_i1_4,<br>TRINITY_DN14215_c0_g1_i1_4,<br>TRINITY_DN12061_c0_g1_i1_4,<br>TRINITY_DN35364_c0_g1_i1_4,<br>TRINITY_DN20376_c0_g3_i1_4,<br>TRINITY_DN16863_c0_g1_i1_4,<br>TRINITY_DN27369_c0_g1_i1_4,<br>TRINITY_DN25759_c0_g1_i2_6,<br>TRINITY_DN5471_c0_g1_i1_6, TRIN-                                                                                                                                                                                                                                                                                                                                |
| 03400 DNA repair and<br>recombination pro-<br>teins | A09180 Brite Hier-<br>archies | 175 | 1.46E-05 | 1.263987 |  | ITY_DN13697_c0_g1_i1_4, TRIN-<br>ITY_DN34538_c0_g1_i1_4, TRIN-<br>ITY_DN34330_c0_g1_i1_4, TRIN-<br>ITY_DN27594_c0_g1_i1_3, TRIN-<br>ITY_DN30179_c0_g1_i1_6, TRIN-<br>ITY_DN13485_c0_g2_i1_6, TRIN-<br>ITY_DN13667_c0_g2_i1_6, TRIN-<br>ITY_DN28906_c0_g1_i1_4, TRIN-<br>ITY_DN27637_c0_g1_i1_4, TRIN-<br>ITY_DN36002_c0_g1_i1_4, TRIN-<br>ITY_DN30434_c0_g1_i1_4, TRIN-<br>ITY_DN32780_c0_g1_i1_6, TRIN-<br>ITY_DN3051_c0_g1_i2_4, TRIN-<br>ITY_DN38907_c0_g1_i1_6, TRIN-<br>ITY_DN16241_c0_g1_i1_4, TRIN-<br>ITY_DN16771_c0_g1_i1_4, TRIN-<br>ITY_DN36191_c0_g1_i1_5, TRIN-<br>ITY_DN31332_c0_g1_i1_4, TRIN-<br>ITY_DN28886_c0_g1_i1_4, TRIN-<br>ITY_DN35014_c0_g1_i1_4, TRIN-<br>ITY_DN19169_c0_g1_i1_4, TRIN-<br>ITY_DN26722_c0_g1_i1_4, TRIN-<br>ITY_DN37118_c0_g1_i1_4, TRIN- |

---

ITY\_DN35334\_c0\_g1\_i1\_6, TRIN-  
ITY\_DN32522\_c0\_g1\_i1\_4, TRIN-  
ITY\_DN8776\_c0\_g1\_i1\_4, TRIN-  
ITY\_DN16779\_c0\_g1\_i1\_4, TRIN-  
ITY\_DN30595\_c0\_g1\_i1\_6, TRIN-  
ITY\_DN33144\_c0\_g1\_i1\_6, TRIN-  
ITY\_DN36814\_c0\_g1\_i1\_4, TRIN-  
ITY\_DN725\_c0\_g1\_i2\_3, TRIN-  
ITY\_DN34934\_c0\_g1\_i1\_4, TRIN-  
ITY\_DN31793\_c0\_g1\_i1\_4, TRIN-  
ITY\_DN17127\_c0\_g1\_i1\_4, TRIN-  
ITY\_DN23064\_c0\_g1\_i1\_4, TRIN-  
ITY\_DN6610\_c0\_g1\_i1\_4, TRIN-  
ITY\_DN16329\_c0\_g2\_i1\_6, TRIN-  
ITY\_DN8590\_c0\_g1\_i1\_4, TRIN-  
ITY\_DN10031\_c0\_g1\_i1\_4, TRIN-  
ITY\_DN1829\_c0\_g1\_i1\_5, TRIN-  
ITY\_DN27649\_c0\_g1\_i1\_4, TRIN-  
ITY\_DN33746\_c0\_g1\_i1\_6, TRIN-  
ITY\_DN29455\_c0\_g1\_i1\_4, TRIN-  
ITY\_DN34648\_c0\_g1\_i1\_4, TRIN-  
ITY\_DN37452\_c0\_g1\_i1\_6, TRIN-  
ITY\_DN33306\_c0\_g1\_i1\_4, TRIN-  
ITY\_DN33907\_c0\_g1\_i1\_6, TRIN-  
ITY\_DN4470\_c0\_g1\_i1\_4, TRIN-  
ITY\_DN38092\_c0\_g1\_i1\_6, TRIN-  
ITY\_DN34868\_c0\_g1\_i1\_4, TRIN-  
ITY\_DN33713\_c0\_g1\_i1\_6, TRIN-  
ITY\_DN19233\_c0\_g1\_i2\_4, TRIN-  
ITY\_DN29340\_c0\_g1\_i1\_6, TRIN-  
ITY\_DN5155\_c0\_g1\_i1\_6, TRIN-  
ITY\_DN28722\_c0\_g1\_i1\_6, TRIN-  
ITY\_DN34741\_c0\_g1\_i1\_4, TRIN-  
ITY\_DN30011\_c0\_g1\_i1\_4, TRIN-  
ITY\_DN33944\_c0\_g1\_i1\_4, TRIN-  
ITY\_DN19175\_c0\_g1\_i1\_4, TRIN-  
ITY\_DN37243\_c0\_g1\_i1\_4, TRIN-

---

---

ITY\_DN27534\_c0\_g1\_i1\_4, TRIN-  
ITY\_DN11525\_c0\_g1\_i1\_4, TRIN-  
ITY\_DN25144\_c1\_g2\_i3\_4, TRIN-  
ITY\_DN618\_c0\_g1\_i1\_4, TRIN-  
ITY\_DN32394\_c0\_g1\_i1\_4, TRIN-  
ITY\_DN31327\_c0\_g1\_i1\_6, TRIN-  
ITY\_DN27161\_c4\_g1\_i1\_6, TRIN-  
ITY\_DN25554\_c1\_g3\_i4\_4, TRIN-  
ITY\_DN12830\_c0\_g1\_i2\_6, TRIN-  
ITY\_DN35711\_c0\_g1\_i1\_4, TRIN-  
ITY\_DN9067\_c0\_g1\_i1\_4, TRIN-  
ITY\_DN5787\_c0\_g1\_i1\_4, TRIN-  
ITY\_DN8486\_c0\_g1\_i1\_4, TRIN-  
ITY\_DN34113\_c0\_g1\_i1\_4, TRIN-  
ITY\_DN6589\_c0\_g1\_i1\_4, TRIN-  
ITY\_DN31030\_c0\_g1\_i1\_4, TRIN-  
ITY\_DN30875\_c0\_g1\_i1\_4, TRIN-  
ITY\_DN27258\_c0\_g1\_i1\_3, TRIN-  
ITY\_DN35991\_c0\_g1\_i1\_4, TRIN-  
ITY\_DN1129\_c0\_g1\_i1\_6, TRIN-  
ITY\_DN10754\_c0\_g1\_i1\_4, TRIN-  
ITY\_DN2047\_c0\_g1\_i2\_2, TRIN-  
ITY\_DN35716\_c0\_g1\_i1\_4, TRIN-  
ITY\_DN26770\_c0\_g1\_i1\_4, TRIN-  
ITY\_DN27536\_c0\_g1\_i1\_4, TRIN-  
ITY\_DN32243\_c0\_g1\_i1\_4, TRIN-  
ITY\_DN28951\_c0\_g1\_i1\_5, TRIN-  
ITY\_DN37299\_c0\_g1\_i1\_4, TRIN-  
ITY\_DN30300\_c0\_g1\_i1\_4, TRIN-  
ITY\_DN2191\_c0\_g1\_i1\_4, TRIN-  
ITY\_DN36754\_c0\_g1\_i1\_4, TRIN-  
ITY\_DN5025\_c0\_g1\_i2\_2, TRIN-  
ITY\_DN19706\_c0\_g1\_i1\_4, TRIN-  
ITY\_DN13304\_c0\_g1\_i2\_4, TRIN-  
ITY\_DN30604\_c0\_g1\_i1\_6, TRIN-  
ITY\_DN30753\_c0\_g1\_i1\_4, TRIN-  
ITY\_DN6328\_c0\_g1\_i1\_6, TRIN-

---

---

ITY\_DN9983\_c0\_g1\_i1\_4, TRIN-  
ITY\_DN3255\_c0\_g1\_i1\_4, TRIN-  
ITY\_DN31202\_c0\_g1\_i1\_6, TRIN-  
ITY\_DN27566\_c0\_g1\_i1\_4, TRIN-  
ITY\_DN11018\_c0\_g1\_i1\_4, TRIN-  
ITY\_DN26008\_c0\_g1\_i1\_6, TRIN-  
ITY\_DN36231\_c0\_g1\_i1\_4, TRIN-  
ITY\_DN37276\_c0\_g1\_i1\_6, TRIN-  
ITY\_DN33065\_c0\_g1\_i1\_6, TRIN-  
ITY\_DN17840\_c0\_g1\_i1\_4, TRIN-  
ITY\_DN27218\_c0\_g1\_i1\_4, TRIN-  
ITY\_DN26111\_c0\_g1\_i1\_4, TRIN-  
ITY\_DN27811\_c0\_g1\_i1\_6, TRIN-  
ITY\_DN15806\_c0\_g2\_i1\_4, TRIN-  
ITY\_DN6891\_c0\_g1\_i1\_6, TRIN-  
ITY\_DN6149\_c0\_g1\_i1\_6, TRIN-  
ITY\_DN30254\_c0\_g1\_i1\_4, TRIN-  
ITY\_DN16768\_c0\_g1\_i1\_4, TRIN-  
ITY\_DN13494\_c0\_g1\_i1\_6, TRIN-  
ITY\_DN18056\_c0\_g1\_i1\_4, TRIN-  
ITY\_DN10336\_c0\_g2\_i1\_4, TRIN-  
ITY\_DN3908\_c0\_g1\_i1\_4, TRIN-  
ITY\_DN28034\_c0\_g1\_i1\_3, TRIN-  
ITY\_DN14813\_c0\_g1\_i1\_4, TRIN-  
ITY\_DN32804\_c0\_g1\_i1\_4, TRIN-  
ITY\_DN5688\_c0\_g1\_i1\_4, TRIN-  
ITY\_DN36955\_c0\_g1\_i1\_6, TRIN-  
ITY\_DN7388\_c0\_g1\_i1\_6, TRIN-  
ITY\_DN28052\_c0\_g1\_i1\_4, TRIN-  
ITY\_DN36641\_c0\_g1\_i1\_4, TRIN-  
ITY\_DN32834\_c0\_g1\_i1\_4, TRIN-  
ITY\_DN16313\_c0\_g1\_i1\_4, TRIN-  
ITY\_DN34137\_c0\_g1\_i1\_4, TRIN-  
ITY\_DN30352\_c0\_g1\_i1\_6, TRIN-  
ITY\_DN34997\_c0\_g1\_i1\_6, TRIN-  
ITY\_DN12403\_c0\_g1\_i1\_4, TRIN-  
ITY\_DN29811\_c0\_g1\_i1\_6, TRIN-

---

|                                       |                                       |     |          |         |                                                                                                                                                                                                                                                                                                                                                                                                                                                                                                                                                                                                                                                                                                                                                                           |
|---------------------------------------|---------------------------------------|-----|----------|---------|---------------------------------------------------------------------------------------------------------------------------------------------------------------------------------------------------------------------------------------------------------------------------------------------------------------------------------------------------------------------------------------------------------------------------------------------------------------------------------------------------------------------------------------------------------------------------------------------------------------------------------------------------------------------------------------------------------------------------------------------------------------------------|
| A09120 Genetic Information Processing | A09120 Genetic Information Processing | 193 | 1.51E-04 | 1.19562 | ITY_DN28652_c0_g1_i1_4, TRINITY_DN30904_c0_g1_i1_4, TRINITY_DN14947_c0_g1_i1_4, TRINITY_DN35240_c0_g1_i1_4, TRINITY_DN31839_c0_g1_i1_6, TRINITY_DN18488_c0_g1_i1_4, TRINITY_DN35586_c0_g1_i1_4, TRINITY_DN12617_c0_g1_i2_4, TRINITY_DN10675_c0_g1_i1_4, TRINITY_DN36306_c0_g1_i1_4, TRINITY_DN346_c0_g1_i1_4, TRINITY_DN30110_c0_g1_i1_4, TRINITY_DN29690_c0_g1_i1_2, TRINITY_DN35718_c0_g1_i1_4, TRINITY_DN34291_c0_g1_i1_4, TRINITY_DN14747_c0_g1_i1_6, TRINITY_DN9318_c0_g1_i1_4, TRINITY_DN29568_c0_g1_i1_4, TRINITY_DN25759_c0_g2_i1_6, TRINITY_DN20949_c0_g1_i1_4, TRINITY_DN10198_c0_g2_i1_4, TRINITY_DN4058_c0_g1_i1_6, TRINITY_DN36727_c0_g1_i1_4, TRINITY_DN28569_c0_g1_i1_6, TRINITY_DN14709_c0_g1_i1_5, TRINITY_DN2936_c0_g1_i1_4, TRINITY_DN36766_c0_g1_i1_4 |
|                                       |                                       |     |          |         | TRINITY_DN30255_c0_g1_i1_4, TRINITY_DN32182_c0_g1_i1_4, TRINITY_DN26817_c0_g1_i1_4, TRINITY_DN31947_c0_g1_i1_4, TRINITY_DN35285_c0_g1_i1_4, TRINITY_DN36276_c0_g1_i1_4, TRINITY_DN12061_c0_g1_i1_4, TRINITY_DN35364_c0_g1_i1_4, TRINITY_DN34538_c0_g1_i1_4, TRINITY_DN27594_c0_g1_i1_3,                                                                                                                                                                                                                                                                                                                                                                                                                                                                                   |

---

TRINITY\_DN13667\_c0\_g2\_i1\_6,  
TRINITY\_DN36002\_c0\_g1\_i1\_4,  
TRINITY\_DN30434\_c0\_g1\_i1\_4,  
TRINITY\_DN16771\_c0\_g1\_i1\_4,  
TRINITY\_DN36191\_c0\_g1\_i1\_5,  
TRINITY\_DN19169\_c0\_g1\_i1\_4,  
TRINITY\_DN26722\_c0\_g1\_i1\_4,  
TRINITY\_DN37118\_c0\_g1\_i1\_4,  
TRINITY\_DN35334\_c0\_g1\_i1\_6,  
TRINITY\_DN8776\_c0\_g1\_i1\_4, TRIN-  
ITY\_DN33144\_c0\_g1\_i1\_6, TRIN-  
ITY\_DN34934\_c0\_g1\_i1\_4, TRIN-  
ITY\_DN31793\_c0\_g1\_i1\_4, TRIN-  
ITY\_DN17127\_c0\_g1\_i1\_4, TRIN-  
ITY\_DN23064\_c0\_g1\_i1\_4, TRIN-  
ITY\_DN8590\_c0\_g1\_i1\_4, TRIN-  
ITY\_DN1829\_c0\_g1\_i1\_5, TRIN-  
ITY\_DN27649\_c0\_g1\_i1\_4, TRIN-  
ITY\_DN33746\_c0\_g1\_i1\_6, TRIN-  
ITY\_DN34648\_c0\_g1\_i1\_4, TRIN-  
ITY\_DN33313\_c0\_g1\_i1\_4, TRIN-  
ITY\_DN5155\_c0\_g1\_i1\_6, TRIN-  
ITY\_DN34741\_c0\_g1\_i1\_4, TRIN-  
ITY\_DN30011\_c0\_g1\_i1\_4, TRIN-  
ITY\_DN33944\_c0\_g1\_i1\_4, TRIN-  
ITY\_DN27534\_c0\_g1\_i1\_4, TRIN-  
ITY\_DN618\_c0\_g1\_i1\_4, TRIN-  
ITY\_DN31327\_c0\_g1\_i1\_6, TRIN-  
ITY\_DN12830\_c0\_g1\_i2\_6, TRIN-  
ITY\_DN35711\_c0\_g1\_i1\_4, TRIN-  
ITY\_DN9067\_c0\_g1\_i1\_4, TRIN-  
ITY\_DN5787\_c0\_g1\_i1\_4, TRIN-  
ITY\_DN8486\_c0\_g1\_i1\_4, TRIN-  
ITY\_DN31030\_c0\_g1\_i1\_4, TRIN-  
ITY\_DN27258\_c0\_g1\_i1\_3, TRIN-  
ITY\_DN1129\_c0\_g1\_i1\_6, TRIN-  
ITY\_DN2047\_c0\_g1\_i2\_2, TRIN-

---

---

ITY\_DN13304\_c0\_g1\_i2\_4, TRIN-  
ITY\_DN30604\_c0\_g1\_i1\_6, TRIN-  
ITY\_DN30604\_c0\_g1\_i1\_4, TRIN-  
ITY\_DN31202\_c0\_g1\_i1\_6, TRIN-  
ITY\_DN27566\_c0\_g1\_i1\_4, TRIN-  
ITY\_DN26008\_c0\_g1\_i1\_6, TRIN-  
ITY\_DN36231\_c0\_g1\_i1\_4, TRIN-  
ITY\_DN37276\_c0\_g1\_i1\_6, TRIN-  
ITY\_DN33065\_c0\_g1\_i1\_6, TRIN-  
ITY\_DN17840\_c0\_g1\_i1\_4, TRIN-  
ITY\_DN27218\_c0\_g1\_i1\_4, TRIN-  
ITY\_DN27811\_c0\_g1\_i1\_6, TRIN-  
ITY\_DN6891\_c0\_g1\_i1\_6, TRIN-  
ITY\_DN18056\_c0\_g1\_i1\_4, TRIN-  
ITY\_DN10336\_c0\_g2\_i1\_4, TRIN-  
ITY\_DN29389\_c0\_g1\_i1\_4, TRIN-  
ITY\_DN14813\_c0\_g1\_i1\_4, TRIN-  
ITY\_DN32834\_c0\_g1\_i1\_4, TRIN-  
ITY\_DN30352\_c0\_g1\_i1\_6, TRIN-  
ITY\_DN8568\_c0\_g1\_i1\_4, TRIN-  
ITY\_DN29811\_c0\_g1\_i1\_6, TRIN-  
ITY\_DN28652\_c0\_g1\_i1\_4, TRIN-  
ITY\_DN30904\_c0\_g1\_i1\_4, TRIN-  
ITY\_DN36395\_c0\_g1\_i1\_4, TRIN-  
ITY\_DN35240\_c0\_g1\_i1\_4, TRIN-  
ITY\_DN36306\_c0\_g1\_i1\_4, TRIN-  
ITY\_DN29690\_c0\_g1\_i1\_2, TRIN-  
ITY\_DN26835\_c0\_g1\_i1\_4, TRIN-  
ITY\_DN34291\_c0\_g1\_i1\_4, TRIN-  
ITY\_DN14747\_c0\_g1\_i1\_6, TRIN-  
ITY\_DN9318\_c0\_g1\_i1\_4, TRIN-  
ITY\_DN29568\_c0\_g1\_i1\_4, TRIN-  
ITY\_DN20949\_c0\_g1\_i1\_4, TRIN-  
ITY\_DN26616\_c0\_g1\_i1\_4, TRIN-  
ITY\_DN14709\_c0\_g1\_i1\_5, TRIN-  
ITY\_DN2936\_c0\_g1\_i1\_4, TRIN-  
ITY\_DN36766\_c0\_g1\_i1\_4, TRIN-

---



---

ITY\_DN25720\_c0\_g2\_i1\_4, TRIN-  
ITY\_DN28880\_c0\_g1\_i1\_4, TRIN-  
ITY\_DN20918\_c0\_g1\_i1\_4, TRIN-  
ITY\_DN14215\_c0\_g1\_i1\_4, TRIN-  
ITY\_DN20376\_c0\_g3\_i1\_4, TRIN-  
ITY\_DN16863\_c0\_g1\_i1\_4, TRIN-  
ITY\_DN27369\_c0\_g1\_i1\_4, TRIN-  
ITY\_DN25759\_c0\_g1\_i2\_6, TRIN-  
ITY\_DN5471\_c0\_g1\_i1\_6, TRIN-  
ITY\_DN13697\_c0\_g1\_i1\_4, TRIN-  
ITY\_DN34330\_c0\_g1\_i1\_4, TRIN-  
ITY\_DN30179\_c0\_g1\_i1\_6, TRIN-  
ITY\_DN13485\_c0\_g2\_i1\_6, TRIN-  
ITY\_DN28906\_c0\_g1\_i1\_4, TRIN-  
ITY\_DN27637\_c0\_g1\_i1\_4, TRIN-  
ITY\_DN32780\_c0\_g1\_i1\_6, TRIN-  
ITY\_DN3051\_c0\_g1\_i2\_4, TRIN-  
ITY\_DN38907\_c0\_g1\_i1\_6, TRIN-  
ITY\_DN16241\_c0\_g1\_i1\_4, TRIN-  
ITY\_DN28926\_c0\_g1\_i1\_4, TRIN-  
ITY\_DN31332\_c0\_g1\_i1\_4, TRIN-  
ITY\_DN28886\_c0\_g1\_i1\_4, TRIN-  
ITY\_DN35014\_c0\_g1\_i1\_4, TRIN-  
ITY\_DN29693\_c0\_g1\_i1\_4, TRIN-  
ITY\_DN32522\_c0\_g1\_i1\_4, TRIN-  
ITY\_DN16779\_c0\_g1\_i1\_4, TRIN-  
ITY\_DN30595\_c0\_g1\_i1\_6, TRIN-  
ITY\_DN36814\_c0\_g1\_i1\_4, TRIN-  
ITY\_DN725\_c0\_g1\_i2\_3, TRIN-  
ITY\_DN6610\_c0\_g1\_i1\_4, TRIN-  
ITY\_DN16329\_c0\_g2\_i1\_6, TRIN-  
ITY\_DN10031\_c0\_g1\_i1\_4, TRIN-  
ITY\_DN29455\_c0\_g1\_i1\_4, TRIN-  
ITY\_DN37452\_c0\_g1\_i1\_6, TRIN-  
ITY\_DN33306\_c0\_g1\_i1\_4, TRIN-  
ITY\_DN33907\_c0\_g1\_i1\_6, TRIN-  
ITY\_DN4470\_c0\_g1\_i1\_4, TRIN-

---

---

ITY\_DN38092\_c0\_g1\_i1\_6, TRIN-  
ITY\_DN34868\_c0\_g1\_i1\_4, TRIN-  
ITY\_DN33713\_c0\_g1\_i1\_6, TRIN-  
ITY\_DN19233\_c0\_g1\_i2\_4, TRIN-  
ITY\_DN34048\_c0\_g1\_i1\_4, TRIN-  
ITY\_DN29340\_c0\_g1\_i1\_6, TRIN-  
ITY\_DN28722\_c0\_g1\_i1\_6, TRIN-  
ITY\_DN29940\_c0\_g1\_i1\_4, TRIN-  
ITY\_DN34287\_c0\_g1\_i1\_4, TRIN-  
ITY\_DN19175\_c0\_g1\_i1\_4, TRIN-  
ITY\_DN37243\_c0\_g1\_i1\_4, TRIN-  
ITY\_DN11525\_c0\_g1\_i1\_4, TRIN-  
ITY\_DN25144\_c1\_g2\_i3\_4, TRIN-  
ITY\_DN32394\_c0\_g1\_i1\_4, TRIN-  
ITY\_DN27161\_c4\_g1\_i1\_6, TRIN-  
ITY\_DN25554\_c1\_g3\_i4\_4, TRIN-  
ITY\_DN34113\_c0\_g1\_i1\_4, TRIN-  
ITY\_DN6589\_c0\_g1\_i1\_4, TRIN-  
ITY\_DN30875\_c0\_g1\_i1\_4, TRIN-  
ITY\_DN35991\_c0\_g1\_i1\_4, TRIN-  
ITY\_DN29512\_c0\_g1\_i1\_4, TRIN-  
ITY\_DN10754\_c0\_g1\_i1\_4, TRIN-  
ITY\_DN35716\_c0\_g1\_i1\_4, TRIN-  
ITY\_DN26770\_c0\_g1\_i1\_4, TRIN-  
ITY\_DN27536\_c0\_g1\_i1\_4, TRIN-  
ITY\_DN32243\_c0\_g1\_i1\_4, TRIN-  
ITY\_DN28951\_c0\_g1\_i1\_5, TRIN-  
ITY\_DN37299\_c0\_g1\_i1\_4, TRIN-  
ITY\_DN30300\_c0\_g1\_i1\_4, TRIN-  
ITY\_DN2191\_c0\_g1\_i1\_4, TRIN-  
ITY\_DN36754\_c0\_g1\_i1\_4, TRIN-  
ITY\_DN5025\_c0\_g1\_i2\_2, TRIN-  
ITY\_DN19706\_c0\_g1\_i1\_4, TRIN-  
ITY\_DN30753\_c0\_g1\_i1\_4, TRIN-  
ITY\_DN6328\_c0\_g1\_i1\_6, TRIN-  
ITY\_DN9983\_c0\_g1\_i1\_4, TRIN-  
ITY\_DN3255\_c0\_g1\_i1\_4, TRIN-

---

---

ITY\_DN26251\_c0\_g1\_i1\_4, TRIN-  
ITY\_DN11018\_c0\_g1\_i1\_4, TRIN-  
ITY\_DN26111\_c0\_g1\_i1\_4, TRIN-  
ITY\_DN15806\_c0\_g2\_i1\_4, TRIN-  
ITY\_DN6149\_c0\_g1\_i1\_6, TRIN-  
ITY\_DN30254\_c0\_g1\_i1\_4, TRIN-  
ITY\_DN16768\_c0\_g1\_i1\_4, TRIN-  
ITY\_DN13494\_c0\_g1\_i1\_6, TRIN-  
ITY\_DN3908\_c0\_g1\_i1\_4, TRIN-  
ITY\_DN28034\_c0\_g1\_i1\_3, TRIN-  
ITY\_DN32804\_c0\_g1\_i1\_4, TRIN-  
ITY\_DN5688\_c0\_g1\_i1\_4, TRIN-  
ITY\_DN33073\_c0\_g1\_i1\_4, TRIN-  
ITY\_DN36955\_c0\_g1\_i1\_6, TRIN-  
ITY\_DN7388\_c0\_g1\_i1\_6, TRIN-  
ITY\_DN28052\_c0\_g1\_i1\_4, TRIN-  
ITY\_DN36641\_c0\_g1\_i1\_4, TRIN-  
ITY\_DN16313\_c0\_g1\_i1\_4, TRIN-  
ITY\_DN34137\_c0\_g1\_i1\_4, TRIN-  
ITY\_DN34997\_c0\_g1\_i1\_6, TRIN-  
ITY\_DN12403\_c0\_g1\_i1\_4, TRIN-  
ITY\_DN14947\_c0\_g1\_i1\_4, TRIN-  
ITY\_DN31839\_c0\_g1\_i1\_6, TRIN-  
ITY\_DN18488\_c0\_g1\_i1\_4, TRIN-  
ITY\_DN35586\_c0\_g1\_i1\_4, TRIN-  
ITY\_DN12617\_c0\_g1\_i2\_4, TRIN-  
ITY\_DN10675\_c0\_g1\_i1\_4, TRIN-  
ITY\_DN346\_c0\_g1\_i1\_4, TRIN-  
ITY\_DN30110\_c0\_g1\_i1\_4, TRIN-  
ITY\_DN35718\_c0\_g1\_i1\_4, TRIN-  
ITY\_DN25759\_c0\_g2\_i1\_6, TRIN-  
ITY\_DN10198\_c0\_g2\_i1\_4, TRIN-  
ITY\_DN4058\_c0\_g1\_i1\_6, TRIN-  
ITY\_DN36727\_c0\_g1\_i1\_4, TRIN-  
ITY\_DN28569\_c0\_g1\_i1\_6

---

|                                           |                               |     |          |             |  |                                                                                                                                                                                                                                                                                                                                                                                                                                                                                                                                                                                                                                                                                                                                                                                                                                             |
|-------------------------------------------|-------------------------------|-----|----------|-------------|--|---------------------------------------------------------------------------------------------------------------------------------------------------------------------------------------------------------------------------------------------------------------------------------------------------------------------------------------------------------------------------------------------------------------------------------------------------------------------------------------------------------------------------------------------------------------------------------------------------------------------------------------------------------------------------------------------------------------------------------------------------------------------------------------------------------------------------------------------|
|                                           |                               |     |          |             |  | TRINITY_DN31687_c0_g1_i1_4,<br>TRINITY_DN127_c0_g2_i1_6, TRIN-<br>ITY_DN3062_c0_g2_i1_4, TRIN-<br>ITY_DN31880_c0_g1_i1_4, TRIN-<br>ITY_DN33884_c0_g1_i1_4, TRIN-<br>ITY_DN30746_c0_g1_i1_4, TRIN-<br>ITY_DN29435_c0_g1_i1_6, TRIN-<br>ITY_DN30161_c0_g1_i1_6, TRIN-<br>ITY_DN3293_c0_g1_i1_4, TRIN-<br>ITY_DN37346_c0_g1_i1_4, TRIN-<br>ITY_DN27451_c0_g1_i1_4, TRIN-<br>ITY_DN27394_c0_g1_i1_4, TRIN-<br>ITY_DN38780_c0_g1_i1_6, TRIN-<br>ITY_DN31588_c0_g1_i1_4, TRIN-<br>ITY_DN35640_c0_g1_i1_4, TRIN-<br>ITY_DN28649_c0_g1_i1_4, TRIN-<br>ITY_DN26605_c0_g1_i1_4, TRIN-<br>ITY_DN31949_c0_g1_i1_4, TRIN-<br>ITY_DN29834_c0_g1_i1_6, TRIN-<br>ITY_DN29924_c0_g1_i1_4, TRIN-<br>ITY_DN35824_c0_g1_i1_4, TRIN-<br>ITY_DN33593_c0_g1_i1_4, TRIN-<br>ITY_DN4679_c0_g1_i1_6, TRIN-<br>ITY_DN27308_c0_g1_i1_4, TRIN-<br>ITY_DN37350_c0_g1_i1_4 |
| 00564 Glycerophos-<br>pholipid metabolism | A09100 Metabo-<br>lism        | 25  | 5.87E-04 | 2.020566377 |  | TRINITY_DN30255_c0_g1_i1_4,<br>TRINITY_DN25720_c0_g2_i1_4,<br>TRINITY_DN32182_c0_g1_i1_4,<br>TRINITY_DN26817_c0_g1_i1_4,<br>TRINITY_DN35285_c0_g1_i1_4,<br>TRINITY_DN36276_c0_g1_i1_4,<br>TRINITY_DN20918_c0_g1_i1_4,<br>TRINITY_DN14215_c0_g1_i1_4,<br>TRINITY_DN12061_c0_g1_i1_4,<br>TRINITY_DN35364_c0_g1_i1_4,<br>TRINITY_DN20376_c0_g3_i1_4,<br>TRINITY_DN16863_c0_g1_i1_4,                                                                                                                                                                                                                                                                                                                                                                                                                                                            |
| 03021 Transcription<br>machinery          | A09180 Brite Hier-<br>archies | 182 | 8.10E-04 | 1.179652998 |  |                                                                                                                                                                                                                                                                                                                                                                                                                                                                                                                                                                                                                                                                                                                                                                                                                                             |

---

TRINITY\_DN27369\_c0\_g1\_i1\_4,  
TRINITY\_DN25759\_c0\_g1\_i2\_6,  
TRINITY\_DN5471\_c0\_g1\_i1\_6, TRIN-  
ITY\_DN13697\_c0\_g1\_i1\_4, TRIN-  
ITY\_DN34538\_c0\_g1\_i1\_4, TRIN-  
ITY\_DN34330\_c0\_g1\_i1\_4, TRIN-  
ITY\_DN27594\_c0\_g1\_i1\_3, TRIN-  
ITY\_DN30179\_c0\_g1\_i1\_6, TRIN-  
ITY\_DN13485\_c0\_g2\_i1\_6, TRIN-  
ITY\_DN13667\_c0\_g2\_i1\_6, TRIN-  
ITY\_DN28906\_c0\_g1\_i1\_4, TRIN-  
ITY\_DN27637\_c0\_g1\_i1\_4, TRIN-  
ITY\_DN36002\_c0\_g1\_i1\_4, TRIN-  
ITY\_DN30434\_c0\_g1\_i1\_4, TRIN-  
ITY\_DN32780\_c0\_g1\_i1\_6, TRIN-  
ITY\_DN3051\_c0\_g1\_i2\_4, TRIN-  
ITY\_DN38907\_c0\_g1\_i1\_6, TRIN-  
ITY\_DN16241\_c0\_g1\_i1\_4, TRIN-  
ITY\_DN16771\_c0\_g1\_i1\_4, TRIN-  
ITY\_DN36191\_c0\_g1\_i1\_5, TRIN-  
ITY\_DN31332\_c0\_g1\_i1\_4, TRIN-  
ITY\_DN28886\_c0\_g1\_i1\_4, TRIN-  
ITY\_DN35014\_c0\_g1\_i1\_4, TRIN-  
ITY\_DN19169\_c0\_g1\_i1\_4, TRIN-  
ITY\_DN26722\_c0\_g1\_i1\_4, TRIN-  
ITY\_DN37118\_c0\_g1\_i1\_4, TRIN-  
ITY\_DN35334\_c0\_g1\_i1\_6, TRIN-  
ITY\_DN32522\_c0\_g1\_i1\_4, TRIN-  
ITY\_DN8776\_c0\_g1\_i1\_4, TRIN-  
ITY\_DN16779\_c0\_g1\_i1\_4, TRIN-  
ITY\_DN30595\_c0\_g1\_i1\_6, TRIN-  
ITY\_DN33144\_c0\_g1\_i1\_6, TRIN-  
ITY\_DN36814\_c0\_g1\_i1\_4, TRIN-  
ITY\_DN725\_c0\_g1\_i2\_3, TRIN-  
ITY\_DN34934\_c0\_g1\_i1\_4, TRIN-  
ITY\_DN31793\_c0\_g1\_i1\_4, TRIN-  
ITY\_DN17127\_c0\_g1\_i1\_4, TRIN-

---

---

ITY\_DN23064\_c0\_g1\_i1\_4, TRIN-  
ITY\_DN6610\_c0\_g1\_i1\_4, TRIN-  
ITY\_DN16329\_c0\_g2\_i1\_6, TRIN-  
ITY\_DN8590\_c0\_g1\_i1\_4, TRIN-  
ITY\_DN10031\_c0\_g1\_i1\_4, TRIN-  
ITY\_DN1829\_c0\_g1\_i1\_5, TRIN-  
ITY\_DN27649\_c0\_g1\_i1\_4, TRIN-  
ITY\_DN33746\_c0\_g1\_i1\_6, TRIN-  
ITY\_DN29455\_c0\_g1\_i1\_4, TRIN-  
ITY\_DN34648\_c0\_g1\_i1\_4, TRIN-  
ITY\_DN37452\_c0\_g1\_i1\_6, TRIN-  
ITY\_DN33306\_c0\_g1\_i1\_4, TRIN-  
ITY\_DN33907\_c0\_g1\_i1\_6, TRIN-  
ITY\_DN4470\_c0\_g1\_i1\_4, TRIN-  
ITY\_DN38092\_c0\_g1\_i1\_6, TRIN-  
ITY\_DN34868\_c0\_g1\_i1\_4, TRIN-  
ITY\_DN33713\_c0\_g1\_i1\_6, TRIN-  
ITY\_DN19233\_c0\_g1\_i2\_4, TRIN-  
ITY\_DN34048\_c0\_g1\_i1\_4, TRIN-  
ITY\_DN29340\_c0\_g1\_i1\_6, TRIN-  
ITY\_DN5155\_c0\_g1\_i1\_6, TRIN-  
ITY\_DN28722\_c0\_g1\_i1\_6, TRIN-  
ITY\_DN34741\_c0\_g1\_i1\_4, TRIN-  
ITY\_DN34287\_c0\_g1\_i1\_4, TRIN-  
ITY\_DN30011\_c0\_g1\_i1\_4, TRIN-  
ITY\_DN33944\_c0\_g1\_i1\_4, TRIN-  
ITY\_DN19175\_c0\_g1\_i1\_4, TRIN-  
ITY\_DN37243\_c0\_g1\_i1\_4, TRIN-  
ITY\_DN27534\_c0\_g1\_i1\_4, TRIN-  
ITY\_DN11525\_c0\_g1\_i1\_4, TRIN-  
ITY\_DN25144\_c1\_g2\_i3\_4, TRIN-  
ITY\_DN618\_c0\_g1\_i1\_4, TRIN-  
ITY\_DN32394\_c0\_g1\_i1\_4, TRIN-  
ITY\_DN31327\_c0\_g1\_i1\_6, TRIN-  
ITY\_DN27161\_c4\_g1\_i1\_6, TRIN-  
ITY\_DN25554\_c1\_g3\_i4\_4, TRIN-  
ITY\_DN12830\_c0\_g1\_i2\_6, TRIN-

---

---

ITY\_DN35711\_c0\_g1\_i1\_4, TRIN-  
ITY\_DN9067\_c0\_g1\_i1\_4, TRIN-  
ITY\_DN5787\_c0\_g1\_i1\_4, TRIN-  
ITY\_DN8486\_c0\_g1\_i1\_4, TRIN-  
ITY\_DN34113\_c0\_g1\_i1\_4, TRIN-  
ITY\_DN6589\_c0\_g1\_i1\_4, TRIN-  
ITY\_DN31030\_c0\_g1\_i1\_4, TRIN-  
ITY\_DN30875\_c0\_g1\_i1\_4, TRIN-  
ITY\_DN27258\_c0\_g1\_i1\_3, TRIN-  
ITY\_DN35991\_c0\_g1\_i1\_4, TRIN-  
ITY\_DN1129\_c0\_g1\_i1\_6, TRIN-  
ITY\_DN10754\_c0\_g1\_i1\_4, TRIN-  
ITY\_DN2047\_c0\_g1\_i2\_2, TRIN-  
ITY\_DN35716\_c0\_g1\_i1\_4, TRIN-  
ITY\_DN26770\_c0\_g1\_i1\_4, TRIN-  
ITY\_DN27536\_c0\_g1\_i1\_4, TRIN-  
ITY\_DN32243\_c0\_g1\_i1\_4, TRIN-  
ITY\_DN28951\_c0\_g1\_i1\_5, TRIN-  
ITY\_DN37299\_c0\_g1\_i1\_4, TRIN-  
ITY\_DN30300\_c0\_g1\_i1\_4, TRIN-  
ITY\_DN2191\_c0\_g1\_i1\_4, TRIN-  
ITY\_DN36754\_c0\_g1\_i1\_4, TRIN-  
ITY\_DN5025\_c0\_g1\_i2\_2, TRIN-  
ITY\_DN19706\_c0\_g1\_i1\_4, TRIN-  
ITY\_DN13304\_c0\_g1\_i2\_4, TRIN-  
ITY\_DN30604\_c0\_g1\_i1\_6, TRIN-  
ITY\_DN30753\_c0\_g1\_i1\_4, TRIN-  
ITY\_DN30604\_c0\_g1\_i1\_4, TRIN-  
ITY\_DN6328\_c0\_g1\_i1\_6, TRIN-  
ITY\_DN9983\_c0\_g1\_i1\_4, TRIN-  
ITY\_DN3255\_c0\_g1\_i1\_4, TRIN-  
ITY\_DN26251\_c0\_g1\_i1\_4, TRIN-  
ITY\_DN31202\_c0\_g1\_i1\_6, TRIN-  
ITY\_DN27566\_c0\_g1\_i1\_4, TRIN-  
ITY\_DN11018\_c0\_g1\_i1\_4, TRIN-  
ITY\_DN26008\_c0\_g1\_i1\_6, TRIN-  
ITY\_DN36231\_c0\_g1\_i1\_4, TRIN-

---

---

ITY\_DN37276\_c0\_g1\_i1\_6, TRIN-  
ITY\_DN33065\_c0\_g1\_i1\_6, TRIN-  
ITY\_DN17840\_c0\_g1\_i1\_4, TRIN-  
ITY\_DN27218\_c0\_g1\_i1\_4, TRIN-  
ITY\_DN26111\_c0\_g1\_i1\_4, TRIN-  
ITY\_DN27811\_c0\_g1\_i1\_6, TRIN-  
ITY\_DN15806\_c0\_g2\_i1\_4, TRIN-  
ITY\_DN6891\_c0\_g1\_i1\_6, TRIN-  
ITY\_DN6149\_c0\_g1\_i1\_6, TRIN-  
ITY\_DN30254\_c0\_g1\_i1\_4, TRIN-  
ITY\_DN16768\_c0\_g1\_i1\_4, TRIN-  
ITY\_DN13494\_c0\_g1\_i1\_6, TRIN-  
ITY\_DN18056\_c0\_g1\_i1\_4, TRIN-  
ITY\_DN10336\_c0\_g2\_i1\_4, TRIN-  
ITY\_DN29389\_c0\_g1\_i1\_4, TRIN-  
ITY\_DN3908\_c0\_g1\_i1\_4, TRIN-  
ITY\_DN28034\_c0\_g1\_i1\_3, TRIN-  
ITY\_DN14813\_c0\_g1\_i1\_4, TRIN-  
ITY\_DN32804\_c0\_g1\_i1\_4, TRIN-  
ITY\_DN5688\_c0\_g1\_i1\_4, TRIN-  
ITY\_DN33073\_c0\_g1\_i1\_4, TRIN-  
ITY\_DN36955\_c0\_g1\_i1\_6, TRIN-  
ITY\_DN7388\_c0\_g1\_i1\_6, TRIN-  
ITY\_DN28052\_c0\_g1\_i1\_4, TRIN-  
ITY\_DN36641\_c0\_g1\_i1\_4, TRIN-  
ITY\_DN32834\_c0\_g1\_i1\_4, TRIN-  
ITY\_DN16313\_c0\_g1\_i1\_4, TRIN-  
ITY\_DN34137\_c0\_g1\_i1\_4, TRIN-  
ITY\_DN30352\_c0\_g1\_i1\_6, TRIN-  
ITY\_DN34997\_c0\_g1\_i1\_6, TRIN-  
ITY\_DN12403\_c0\_g1\_i1\_4, TRIN-  
ITY\_DN29811\_c0\_g1\_i1\_6, TRIN-  
ITY\_DN28652\_c0\_g1\_i1\_4, TRIN-  
ITY\_DN30904\_c0\_g1\_i1\_4, TRIN-  
ITY\_DN14947\_c0\_g1\_i1\_4, TRIN-  
ITY\_DN35240\_c0\_g1\_i1\_4, TRIN-  
ITY\_DN31839\_c0\_g1\_i1\_6, TRIN-

---



|  |  |  |  |  |  |  |  |  |  |  |  |  |  |  |  |  |  |  |  |  |  |  |  |  |  |  |  |  |  |  |  |  |  |  |  |  |  |  |  |  |  |  |  |  |  |  |  |  |  |  |  |  |  |  |  |  |  |  |  |  |  |  |  |  |  |  |  |  |  |  |  |  |  |  |  |  |  |  |  |  |  |  |  |  |  |  |  |  |  |  |  |  |  |  |  |  |  |  |  |  |  |  |  |  |  |  |  |  |  |  |  |  |  |  |  |  |  |  |  |  |  |  |  |  |  |  |  |  |  |  |  |  |  |  |  |  |  |  |  |  |  |  |  |  |  |  |  |  |  |  |  |  |  |  |  |  |  |  |  |  |  |  |  |  |  |  |  |  |  |  |  |  |  |  |  |  |  |  |  |  |  |  |  |  |  |  |  |  |  |  |  |  |  |  |  |  |  |  |  |  |  |  |  |  |  |  |  |  |  |  |  |  |  |  |  |  |  |  |  |  |  |  |  |  |  |  |  |  |  |  |  |  |  |  |  |  |  |  |  |  |  |  |  |  |  |  |  |  |  |  |  |  |  |  |  |  |  |  |  |  |  |  |  |  |  |  |  |  |  |  |  |  |  |  |  |  |  |  |  |  |  |  |  |  |  |  |  |  |  |  |  |  |  |  |  |  |  |  |  |  |  |  |  |  |  |  |  |  |  |  |  |  |  |  |  |  |  |  |  |  |  |  |  |  |  |  |  |  |  |  |  |  |  |  |  |  |  |  |  |  |  |  |  |  |  |  |  |  |  |  |  |  |  |  |  |  |  |  |  |  |  |  |  |  |  |  |  |  |  |  |  |  |  |  |  |  |  |  |  |  |  |  |  |  |  |  |  |  |  |  |  |  |  |  |  |  |  |  |  |  |  |  |  |  |  |  |  |  |  |  |  |  |  |  |  |  |  |  |  |  |  |  |  |  |  |  |  |  |  |  |  |  |  |  |  |  |  |  |  |  |  |  |  |  |  |  |  |  |  |  |  |  |  |  |  |  |  |  |  |  |  |  |  |  |  |  |  |  |  |  |  |  |  |  |  |  |  |  |  |  |  |  |  |  |  |  |  |  |  |  |  |  |  |  |  |  |  |  |  |  |  |  |  |  |  |  |  |  |  |  |  |  |  |  |  |  |  |  |  |  |  |  |  |  |  |  |  |  |  |  |  |  |  |  |  |  |  |  |  |  |  |  |  |  |  |  |  |  |  |  |  |  |  |  |  |  |  |  |  |  |  |  |  |  |  |  |  |  |  |  |  |  |  |  |  |  |  |  |  |  |  |  |  |  |  |  |  |  |  |  |  |  |  |  |  |  |  |  |  |  |  |  |  |  |  |  |  |  |  |  |  |  |  |  |  |  |  |  |  |  |  |  |  |  |  |  |  |  |  |  |  |  |  |  |  |  |  |  |  |  |  |  |  |  |  |  |  |  |  |  |  |  |  |  |  |  |  |  |  |  |  |  |  |  |  |  |  |  |  |  |  |  |  |  |  |  |  |  |  |  |  |  |  |  |  |  |  |  |  |  |  |  |  |  |  |  |  |  |  |  |  |  |  |  |  |  |  |  |  |  |  |  |  |  |  |  |  |  |  |  |  |  |  |  |  |  |  |  |  |  |  |  |  |  |  |  |  |  |  |  |  |  |  |  |  |  |  |  |  |  |  |  |  |  |  |  |  |  |  |  |  |  |  |  |  |  |  |  |  |  |  |  |  |  |  |  |  |  |  |  |  |  |  |  |  |  |  |  |  |  |  |  |  |  |  |  |  |  |  |  |  |  |  |  |  |  |  |  |  |  |  |  |  |  |  |  |  |  |  |  |  |  |  |  |  |  |  |  |  |  |  |  |  |  |  |  |  |  |  |  |  |  |  |  |  |  |  |  |  |  |  |  |  |  |  |  |  |  |  |  |  |  |  |  |  |  |  |  |  |  |  |  |  |  |  |  |  |  |  |  |  |  |  |  |  |  |  |  |  |  |  |  |  |  |  |  |  |  |  |  |  |  |  |  |  |  |  |  |  |  |  |  |  |  |  |  |  |  |  |  |  |  |  |  |  |  |  |  |  |  |  |  |  |  |  |  |  |  |  |  |  |  |  |  |  |  |  |  |  |  |  |  |  |  |  |  |  |  |  |  |  |  |  |  |  |  |  |  |  |  |  |  |  |  |  |  |  |  |  |  |  |  |  |  |  |  |  |  |  |  |  |  |  |  |  |  |  |  |  |  |  |  |  |  |  |  |  |  |  |  |  |  |  |  |  |  |  |  |  |  |  |  |  |  |  |  |  |  |  |  |  |  |  |  |  |  |  |  |  |  |  |  |  |  |  |  |  |  |  |  |  |  |  |  |  |  |  |  |  |  |  |  |  |  |  |  |  |  |  |  |  |  |  |  |  |  |  |  |  |  |  |  |  |  |  |  |  |  |  |  |  |  |  |  |  |  |  |  |  |  |  |  |  |  |  |  |  |  |  |  |  |  |  |  |  |  |  |  |  |  |  |  |  |  |  |  |  |  |  |  |  |  |  |  |  |  |  |  |  |  |  |  |  |  |  |  |  |  |  |  |  |  |  |  |  |  |  |  |  |  |  |  |  |  |  |  |  |  |  |  |  |  |  |  |  |  |  |  |  |  |  |  |  |  |  |  |  |  |  |  |  |  |  |  |  |  |  |  |  |  |  |  |  |  |  |  |  |  |  |  |  |  |  |  |  |  |  |  |  |  |  |  |  |  |  |  |  |  |  |  |  |  |  |  |  |  |  |  |  |  |  |  |  |  |  |  |  |  |  |  |  |  |  |  |  |  |  |  |  |  |  |  |  |  |  |  |  |  |  |  |  |  |  |  |  |  |  |  |  |  |  |  |  |  |  |  |  |  |  |  |  |  |  |  |  |  |  |  |  |  |  |  |  |  |  |  |  |  |  |  |  |  |  |  |  |  |  |  |  |  |  |  |  |  |  |  |  |  |  |  |  |  |  |  |  |  |  |  |  |  |  |  |  |  |  |  |  |  |  |  |  |  |  |  |  |  |  |  |  |  |  |  |  |  |  |  |
|--|--|--|--|--|--|--|--|--|--|--|--|--|--|--|--|--|--|--|--|--|--|--|--|--|--|--|--|--|--|--|--|--|--|--|--|--|--|--|--|--|--|--|--|--|--|--|--|--|--|--|--|--|--|--|--|--|--|--|--|--|--|--|--|--|--|--|--|--|--|--|--|--|--|--|--|--|--|--|--|--|--|--|--|--|--|--|--|--|--|--|--|--|--|--|--|--|--|--|--|--|--|--|--|--|--|--|--|--|--|--|--|--|--|--|--|--|--|--|--|--|--|--|--|--|--|--|--|--|--|--|--|--|--|--|--|--|--|--|--|--|--|--|--|--|--|--|--|--|--|--|--|--|--|--|--|--|--|--|--|--|--|--|--|--|--|--|--|--|--|--|--|--|--|--|--|--|--|--|--|--|--|--|--|--|--|--|--|--|--|--|--|--|--|--|--|--|--|--|--|--|--|--|--|--|--|--|--|--|--|--|--|--|--|--|--|--|--|--|--|--|--|--|--|--|--|--|--|--|--|--|--|--|--|--|--|--|--|--|--|--|--|--|--|--|--|--|--|--|--|--|--|--|--|--|--|--|--|--|--|--|--|--|--|--|--|--|--|--|--|--|--|--|--|--|--|--|--|--|--|--|--|--|--|--|--|--|--|--|--|--|--|--|--|--|--|--|--|--|--|--|--|--|--|--|--|--|--|--|--|--|--|--|--|--|--|--|--|--|--|--|--|--|--|--|--|--|--|--|--|--|--|--|--|--|--|--|--|--|--|--|--|--|--|--|--|--|--|--|--|--|--|--|--|--|--|--|--|--|--|--|--|--|--|--|--|--|--|--|--|--|--|--|--|--|--|--|--|--|--|--|--|--|--|--|--|--|--|--|--|--|--|--|--|--|--|--|--|--|--|--|--|--|--|--|--|--|--|--|--|--|--|--|--|--|--|--|--|--|--|--|--|--|--|--|--|--|--|--|--|--|--|--|--|--|--|--|--|--|--|--|--|--|--|--|--|--|--|--|--|--|--|--|--|--|--|--|--|--|--|--|--|--|--|--|--|--|--|--|--|--|--|--|--|--|--|--|--|--|--|--|--|--|--|--|--|--|--|--|--|--|--|--|--|--|--|--|--|--|--|--|--|--|--|--|--|--|--|--|--|--|--|--|--|--|--|--|--|--|--|--|--|--|--|--|--|--|--|--|--|--|--|--|--|--|--|--|--|--|--|--|--|--|--|--|--|--|--|--|--|--|--|--|--|--|--|--|--|--|--|--|--|--|--|--|--|--|--|--|--|--|--|--|--|--|--|--|--|--|--|--|--|--|--|--|--|--|--|--|--|--|--|--|--|--|--|--|--|--|--|--|--|--|--|--|--|--|--|--|--|--|--|--|--|--|--|--|--|--|--|--|--|--|--|--|--|--|--|--|--|--|--|--|--|--|--|--|--|--|--|--|--|--|--|--|--|--|--|--|--|--|--|--|--|--|--|--|--|--|--|--|--|--|--|--|--|--|--|--|--|--|--|--|--|--|--|--|--|--|--|--|--|--|--|--|--|--|--|--|--|--|--|--|--|--|--|--|--|--|--|--|--|--|--|--|--|--|--|--|--|--|--|--|--|--|--|--|--|--|--|--|--|--|--|--|--|--|--|--|--|--|--|--|--|--|--|--|--|--|--|--|--|--|--|--|--|--|--|--|--|--|--|--|--|--|--|--|--|--|--|--|--|--|--|--|--|--|--|--|--|--|--|--|--|--|--|--|--|--|--|--|--|--|--|--|--|--|--|--|--|--|--|--|--|--|--|--|--|--|--|--|--|--|--|--|--|--|--|--|--|--|--|--|--|--|--|--|--|--|--|--|--|--|--|--|--|--|--|--|--|--|--|--|--|--|--|--|--|--|--|--|--|--|--|--|--|--|--|--|--|--|--|--|--|--|--|--|--|--|--|--|--|--|--|--|--|--|--|--|--|--|--|--|--|--|--|--|--|--|--|--|--|--|--|--|--|--|--|--|--|--|--|--|--|--|--|--|--|--|--|--|--|--|--|--|--|--|--|--|--|--|--|--|--|--|--|--|--|--|--|--|--|--|--|--|--|--|--|--|--|--|--|--|--|--|--|--|--|--|--|--|--|--|--|--|--|--|--|--|--|--|--|--|--|--|--|--|--|--|--|--|--|--|--|--|--|--|--|--|--|--|--|--|--|--|--|--|--|--|--|--|--|--|--|--|--|--|--|--|--|--|--|--|--|--|--|--|--|--|--|--|--|--|--|--|--|--|--|--|--|--|--|--|--|--|--|--|--|--|--|--|--|--|--|--|--|--|--|--|--|--|--|--|--|--|--|--|--|--|--|--|--|--|--|--|--|--|--|--|--|--|--|--|--|--|--|--|--|--|--|--|--|--|--|--|--|--|--|--|--|--|--|--|--|--|--|--|--|--|--|--|--|--|--|--|--|--|--|--|--|--|--|--|--|--|--|--|--|--|--|--|--|--|--|--|--|--|--|--|--|--|--|--|--|--|--|--|--|--|--|--|--|--|--|--|--|--|--|--|--|--|--|--|--|--|--|--|--|--|--|--|--|--|--|--|--|--|--|--|--|--|--|--|--|--|--|--|--|--|--|--|--|--|--|--|--|--|--|--|--|--|--|--|--|--|--|--|--|--|--|--|--|--|--|--|--|--|--|--|--|--|--|--|--|--|--|--|--|--|--|--|--|--|--|--|--|--|--|--|--|--|--|--|--|--|--|--|--|--|--|--|--|--|--|--|--|--|--|--|--|--|--|--|--|--|--|--|--|--|--|--|--|--|--|--|--|--|--|--|--|--|--|--|--|--|--|--|--|--|--|--|--|--|--|--|--|--|--|--|--|--|--|--|--|--|--|--|--|--|--|--|--|--|--|--|--|--|--|--|--|--|--|--|--|--|--|--|--|--|--|--|--|--|--|--|--|--|--|--|--|--|--|--|--|--|--|--|--|--|--|--|--|--|--|--|--|--|--|--|--|--|--|--|--|--|--|--|--|--|--|--|--|--|--|--|--|--|--|--|--|--|--|--|--|--|--|--|--|--|--|--|--|--|--|--|--|--|
|  |  |  |  |  |  |  |  |  |  |  |  |  |  |  |  |  |  |  |  |  |  |  |  |  |  |  |  |  |  |  |  |  |  |  |  |  |  |  |  |  |  |  |  |  |  |  |  |  |  |  |  |  |  |  |  |  |  |  |  |  |  |  |  |  |  |  |  |  |  |  |  |  |  |  |  |  |  |  |  |  |  |  |  |  |  |  |  |  |  |  |  |  |  |  |  |  |  |  |  |  |  |  |  |  |  |  |  |  |  |  |  |  |  |  |  |  |  |  |  |  |  |  |  |  |  |  |  |  |  |  |  |  |  |  |  |  |  |  |  |  |  |  |  |  |  |  |  |  |  |  |  |  |  |  |  |  |  |  |  |  |  |  |  |  |  |  |  |  |  |  |  |  |  |  |  |  |  |  |  |  |  |  |  |  |  |  |  |  |  |  |  |  |  |  |  |  |  |  |  |  |  |  |  |  |  |  |  |  |  |  |  |  |  |  |  |  |  |  |  |  |  |  |  |  |  |  |  |  |  |  |  |  |  |  |  |  |  |  |  |  |  |  |  |  |  |  |  |  |  |  |  |  |  |  |  |  |  |  |  |  |  |  |  |  |  |  |  |  |  |  |  |  |  |  |  |  |  |  |  |  |  |  |  |  |  |  |  |  |  |  |  |  |  |  |  |  |  |  |  |  |  |  |  |  |  |  |  |  |  |  |  |  |  |  |  |  |  |  |  |  |  |  |  |  |  |  |  |  |  |  |  |  |  |  |  |  |  |  |  |  |  |  |  |  |  |  |  |  |  |  |  |  |  |  |  |  |  |  |  |  |  |  |  |  |  |  |  |  |  |  |  |  |  |  |  |  |  |  |  |  |  |  |  |  |  |  |  |  |  |  |  |  |  |  |  |  |  |  |  |  |  |  |  |  |  |  |  |  |  |  |  |  |  |  |  |  |  |  |  |  |  |  |  |  |  |  |  |  |  |  |  |  |  |  |  |  |  |  |  |  |  |  |  |  |  |  |  |  |  |  |  |  |  |  |  |  |  |  |  |  |  |  |  |  |  |  |  |  |  |  |  |  |  |  |  |  |  |  |  |  |  |  |  |  |  |  |  |  |  |  |  |  |  |  |  |  |  |  |  |  |  |  |  |  |  |  |  |  |  |  |  |  |  |  |  |  |  |  |  |  |  |  |  |  |  |  |  |  |  |  |  |  |  |  |  |  |  |  |  |  |  |  |  |  |  |  |  |  |  |  |  |  |  |  |  |  |  |  |  |  |  |  |  |  |  |  |  |  |  |  |  |  |  |  |  |  |  |  |  |  |  |  |  |  |  |  |  |  |  |  |  |  |  |  |  |  |  |  |  |  |  |  |  |  |  |  |  |  |  |  |  |  |  |  |  |  |  |  |  |  |  |  |  |  |  |  |  |  |  |  |  |  |  |  |  |  |  |  |  |  |  |  |  |  |  |  |  |  |  |  |  |  |  |  |  |  |  |  |  |  |  |  |  |  |  |  |  |  |  |  |  |  |  |  |  |  |  |  |  |  |  |  |  |  |  |  |  |  |  |  |  |  |  |  |  |  |  |  |  |  |  |  |  |  |  |  |  |  |  |  |  |  |  |  |  |  |  |  |  |  |  |  |  |  |  |  |  |  |  |  |  |  |  |  |  |  |  |  |  |  |  |  |  |  |  |  |  |  |  |  |  |  |  |  |  |  |  |  |  |  |  |  |  |  |  |  |  |  |  |  |  |  |  |  |  |  |  |  |  |  |  |  |  |  |  |  |  |  |  |  |  |  |  |  |  |  |  |  |  |  |  |  |  |  |  |  |  |  |  |  |  |  |  |  |  |  |  |  |  |  |  |  |  |  |  |  |  |  |  |  |  |  |  |  |  |  |  |  |  |  |  |  |  |  |  |  |  |  |  |  |  |  |  |  |  |  |  |  |  |  |  |  |  |  |  |  |  |  |  |  |  |  |  |  |  |  |  |  |  |  |  |  |  |  |  |  |  |  |  |  |  |  |  |  |  |  |  |  |  |  |  |  |  |  |  |  |  |  |  |  |  |  |  |  |  |  |  |  |  |  |  |  |  |  |  |  |  |  |  |  |  |  |  |  |  |  |  |  |  |  |  |  |  |  |  |  |  |  |  |  |  |  |  |  |  |  |  |  |  |  |  |  |  |  |  |  |  |  |  |  |  |  |  |  |  |  |  |  |  |  |  |  |  |  |  |  |  |  |  |  |  |  |  |  |  |  |  |  |  |  |  |  |  |  |  |  |  |  |  |  |  |  |  |  |  |  |  |  |  |  |  |  |  |  |  |  |  |  |  |  |  |  |  |  |  |  |  |  |  |  |  |  |  |  |  |  |  |  |  |  |  |  |  |  |  |  |  |  |  |  |  |  |  |  |  |  |  |  |  |  |  |  |  |  |  |  |  |  |  |  |  |  |  |  |  |  |  |  |  |  |  |  |  |  |  |  |  |  |  |  |  |  |  |  |  |  |  |  |  |  |  |  |  |  |  |  |  |  |  |  |  |  |  |  |  |  |  |  |  |  |  |  |  |  |  |  |  |  |  |  |  |  |  |  |  |  |  |  |  |  |  |  |  |  |  |  |  |  |  |  |  |  |  |  |  |  |  |  |  |  |  |  |  |  |  |  |  |  |  |  |  |  |  |  |  |  |  |  |  |  |  |  |  |  |  |  |  |  |  |  |  |  |  |  |  |  |  |  |  |  |  |  |  |  |  |  |  |  |  |  |  |  |  |  |  |  |  |  |  |  |  |  |  |  |  |  |  |  |  |  |  |  |  |  |  |  |  |  |  |  |  |  |  |  |  |  |  |  |  |  |  |  |  |  |  |  |  |  |  |  |  |  |  |  |  |  |  |  |  |  |  |  |  |  |  |  |  |  |  |  |  |  |  |  |  |  |  |  |  |  |  |  |  |  |  |  |  |  |  |  |  |  |  |  |  |  |  |  |  |  |  |  |  |  |  |  |  |  |  |  |  |  |  |  |  |  |  |  |  |  |  |  |  |  |  |  |  |  |  |  |  |  |  |  |  |  |  |  |  |  |  |  |  |  |  |  |
|--|--|--|--|--|--|--|--|--|--|--|--|--|--|--|--|--|--|--|--|--|--|--|--|--|--|--|--|--|--|--|--|--|--|--|--|--|--|--|--|--|--|--|--|--|--|--|--|--|--|--|--|--|--|--|--|--|--|--|--|--|--|--|--|--|--|--|--|--|--|--|--|--|--|--|--|--|--|--|--|--|--|--|--|--|--|--|--|--|--|--|--|--|--|--|--|--|--|--|--|--|--|--|--|--|--|--|--|--|--|--|--|--|--|--|--|--|--|--|--|--|--|--|--|--|--|--|--|--|--|--|--|--|--|--|--|--|--|--|--|--|--|--|--|--|--|--|--|--|--|--|--|--|--|--|--|--|--|--|--|--|--|--|--|--|--|--|--|--|--|--|--|--|--|--|--|--|--|--|--|--|--|--|--|--|--|--|--|--|--|--|--|--|--|--|--|--|--|--|--|--|--|--|--|--|--|--|--|--|--|--|--|--|--|--|--|--|--|--|--|--|--|--|--|--|--|--|--|--|--|--|--|--|--|--|--|--|--|--|--|--|--|--|--|--|--|--|--|--|--|--|--|--|--|--|--|--|--|--|--|--|--|--|--|--|--|--|--|--|--|--|--|--|--|--|--|--|--|--|--|--|--|--|--|--|--|--|--|--|--|--|--|--|--|--|--|--|--|--|--|--|--|--|--|--|--|--|--|--|--|--|--|--|--|--|--|--|--|--|--|--|--|--|--|--|--|--|--|--|--|--|--|--|--|--|--|--|--|--|--|--|--|--|--|--|--|--|--|--|--|--|--|--|--|--|--|--|--|--|--|--|--|--|--|--|--|--|--|--|--|--|--|--|--|--|--|--|--|--|--|--|--|--|--|--|--|--|--|--|--|--|--|--|--|--|--|--|--|--|--|--|--|--|--|--|--|--|--|--|--|--|--|--|--|--|--|--|--|--|--|--|--|--|--|--|--|--|--|--|--|--|--|--|--|--|--|--|--|--|--|--|--|--|--|--|--|--|--|--|--|--|--|--|--|--|--|--|--|--|--|--|--|--|--|--|--|--|--|--|--|--|--|--|--|--|--|--|--|--|--|--|--|--|--|--|--|--|--|--|--|--|--|--|--|--|--|--|--|--|--|--|--|--|--|--|--|--|--|--|--|--|--|--|--|--|--|--|--|--|--|--|--|--|--|--|--|--|--|--|--|--|--|--|--|--|--|--|--|--|--|--|--|--|--|--|--|--|--|--|--|--|--|--|--|--|--|--|--|--|--|--|--|--|--|--|--|--|--|--|--|--|--|--|--|--|--|--|--|--|--|--|--|--|--|--|--|--|--|--|--|--|--|--|--|--|--|--|--|--|--|--|--|--|--|--|--|--|--|--|--|--|--|--|--|--|--|--|--|--|--|--|--|--|--|--|--|--|--|--|--|--|--|--|--|--|--|--|--|--|--|--|--|--|--|--|--|--|--|--|--|--|--|--|--|--|--|--|--|--|--|--|--|--|--|--|--|--|--|--|--|--|--|--|--|--|--|--|--|--|--|--|--|--|--|--|--|--|--|--|--|--|--|--|--|--|--|--|--|--|--|--|--|--|--|--|--|--|--|--|--|--|--|--|--|--|--|--|--|--|--|--|--|--|--|--|--|--|--|--|--|--|--|--|--|--|--|--|--|--|--|--|--|--|--|--|--|--|--|--|--|--|--|--|--|--|--|--|--|--|--|--|--|--|--|--|--|--|--|--|--|--|--|--|--|--|--|--|--|--|--|--|--|--|--|--|--|--|--|--|--|--|--|--|--|--|--|--|--|--|--|--|--|--|--|--|--|--|--|--|--|--|--|--|--|--|--|--|--|--|--|--|--|--|--|--|--|--|--|--|--|--|--|--|--|--|--|--|--|--|--|--|--|--|--|--|--|--|--|--|--|--|--|--|--|--|--|--|--|--|--|--|--|--|--|--|--|--|--|--|--|--|--|--|--|--|--|--|--|--|--|--|--|--|--|--|--|--|--|--|--|--|--|--|--|--|--|--|--|--|--|--|--|--|--|--|--|--|--|--|--|--|--|--|--|--|--|--|--|--|--|--|--|--|--|--|--|--|--|--|--|--|--|--|--|--|--|--|--|--|--|--|--|--|--|--|--|--|--|--|--|--|--|--|--|--|--|--|--|--|--|--|--|--|--|--|--|--|--|--|--|--|--|--|--|--|--|--|--|--|--|--|--|--|--|--|--|--|--|--|--|--|--|--|--|--|--|--|--|--|--|--|--|--|--|--|--|--|--|--|--|--|--|--|--|--|--|--|--|--|--|--|--|--|--|--|--|--|--|--|--|--|--|--|--|--|--|--|--|--|--|--|--|--|--|--|--|--|--|--|--|--|--|--|--|--|--|--|--|--|--|--|--|--|--|--|--|--|--|--|--|--|--|--|--|--|--|--|--|--|--|--|--|--|--|--|--|--|--|--|--|--|--|--|--|--|--|--|--|--|--|--|--|--|--|--|--|--|--|--|--|--|--|--|--|--|--|--|--|--|--|--|--|--|--|--|--|--|--|--|--|--|--|--|--|--|--|--|--|--|--|--|--|--|--|--|--|--|--|--|--|--|--|--|--|--|--|--|--|--|--|--|--|--|--|--|--|--|--|--|--|--|--|--|--|--|--|--|--|--|--|--|--|--|--|--|--|--|--|--|--|--|--|--|--|--|--|--|--|--|--|--|--|--|--|--|--|--|--|--|--|--|--|--|--|--|--|--|--|--|--|--|--|--|--|--|--|--|--|--|--|--|--|--|--|--|--|--|--|--|--|--|--|--|--|--|--|--|--|--|--|--|--|--|--|--|--|--|--|--|--|--|--|--|--|--|--|--|--|--|--|--|--|--|--|--|--|--|--|--|--|--|--|--|--|--|--|--|--|--|--|--|--|--|--|--|--|--|--|--|--|--|--|--|--|--|--|--|--|--|--|--|--|--|--|--|--|--|--|--|--|--|--|--|--|--|--|--|--|--|--|--|--|--|--|--|--|--|--|--|--|--|--|--|--|--|--|--|--|--|--|--|--|--|--|--|--|--|--|--|--|--|--|--|--|--|--|--|

---

TRINITY\_DN5471\_c0\_g1\_i1\_6, TRIN-  
ITY\_DN13697\_c0\_g1\_i1\_4, TRIN-  
ITY\_DN34538\_c0\_g1\_i1\_4, TRIN-  
ITY\_DN34330\_c0\_g1\_i1\_4, TRIN-  
ITY\_DN27594\_c0\_g1\_i1\_3, TRIN-  
ITY\_DN30179\_c0\_g1\_i1\_6, TRIN-  
ITY\_DN13485\_c0\_g2\_i1\_6, TRIN-  
ITY\_DN13667\_c0\_g2\_i1\_6, TRIN-  
ITY\_DN28906\_c0\_g1\_i1\_4, TRIN-  
ITY\_DN27637\_c0\_g1\_i1\_4, TRIN-  
ITY\_DN36002\_c0\_g1\_i1\_4, TRIN-  
ITY\_DN30434\_c0\_g1\_i1\_4, TRIN-  
ITY\_DN32780\_c0\_g1\_i1\_6, TRIN-  
ITY\_DN3051\_c0\_g1\_i2\_4, TRIN-  
ITY\_DN38907\_c0\_g1\_i1\_6, TRIN-  
ITY\_DN16241\_c0\_g1\_i1\_4, TRIN-  
ITY\_DN16771\_c0\_g1\_i1\_4, TRIN-  
ITY\_DN36191\_c0\_g1\_i1\_5, TRIN-  
ITY\_DN31332\_c0\_g1\_i1\_4, TRIN-  
ITY\_DN28886\_c0\_g1\_i1\_4, TRIN-  
ITY\_DN35014\_c0\_g1\_i1\_4, TRIN-  
ITY\_DN19169\_c0\_g1\_i1\_4, TRIN-  
ITY\_DN26722\_c0\_g1\_i1\_4, TRIN-  
ITY\_DN37118\_c0\_g1\_i1\_4, TRIN-  
ITY\_DN35334\_c0\_g1\_i1\_6, TRIN-  
ITY\_DN32522\_c0\_g1\_i1\_4, TRIN-  
ITY\_DN8776\_c0\_g1\_i1\_4, TRIN-  
ITY\_DN16779\_c0\_g1\_i1\_4, TRIN-  
ITY\_DN30595\_c0\_g1\_i1\_6, TRIN-  
ITY\_DN33144\_c0\_g1\_i1\_6, TRIN-  
ITY\_DN36814\_c0\_g1\_i1\_4, TRIN-  
ITY\_DN725\_c0\_g1\_i2\_3, TRIN-  
ITY\_DN34934\_c0\_g1\_i1\_4, TRIN-  
ITY\_DN31793\_c0\_g1\_i1\_4, TRIN-  
ITY\_DN17127\_c0\_g1\_i1\_4, TRIN-  
ITY\_DN23064\_c0\_g1\_i1\_4, TRIN-  
ITY\_DN6610\_c0\_g1\_i1\_4, TRIN-

---

---

ITY\_DN16329\_c0\_g2\_i1\_6, TRIN-  
ITY\_DN8590\_c0\_g1\_i1\_4, TRIN-  
ITY\_DN10031\_c0\_g1\_i1\_4, TRIN-  
ITY\_DN1829\_c0\_g1\_i1\_5, TRIN-  
ITY\_DN27649\_c0\_g1\_i1\_4, TRIN-  
ITY\_DN33746\_c0\_g1\_i1\_6, TRIN-  
ITY\_DN29455\_c0\_g1\_i1\_4, TRIN-  
ITY\_DN34648\_c0\_g1\_i1\_4, TRIN-  
ITY\_DN37452\_c0\_g1\_i1\_6, TRIN-  
ITY\_DN33306\_c0\_g1\_i1\_4, TRIN-  
ITY\_DN33907\_c0\_g1\_i1\_6, TRIN-  
ITY\_DN4470\_c0\_g1\_i1\_4, TRIN-  
ITY\_DN38092\_c0\_g1\_i1\_6, TRIN-  
ITY\_DN34868\_c0\_g1\_i1\_4, TRIN-  
ITY\_DN33713\_c0\_g1\_i1\_6, TRIN-  
ITY\_DN19233\_c0\_g1\_i2\_4, TRIN-  
ITY\_DN34048\_c0\_g1\_i1\_4, TRIN-  
ITY\_DN29340\_c0\_g1\_i1\_6, TRIN-  
ITY\_DN5155\_c0\_g1\_i1\_6, TRIN-  
ITY\_DN28722\_c0\_g1\_i1\_6, TRIN-  
ITY\_DN34741\_c0\_g1\_i1\_4, TRIN-  
ITY\_DN34287\_c0\_g1\_i1\_4, TRIN-  
ITY\_DN30011\_c0\_g1\_i1\_4, TRIN-  
ITY\_DN33944\_c0\_g1\_i1\_4, TRIN-  
ITY\_DN19175\_c0\_g1\_i1\_4, TRIN-  
ITY\_DN37243\_c0\_g1\_i1\_4, TRIN-  
ITY\_DN27534\_c0\_g1\_i1\_4, TRIN-  
ITY\_DN11525\_c0\_g1\_i1\_4, TRIN-  
ITY\_DN25144\_c1\_g2\_i3\_4, TRIN-  
ITY\_DN618\_c0\_g1\_i1\_4, TRIN-  
ITY\_DN32394\_c0\_g1\_i1\_4, TRIN-  
ITY\_DN31327\_c0\_g1\_i1\_6, TRIN-  
ITY\_DN27161\_c4\_g1\_i1\_6, TRIN-  
ITY\_DN25554\_c1\_g3\_i4\_4, TRIN-  
ITY\_DN12830\_c0\_g1\_i2\_6, TRIN-  
ITY\_DN35711\_c0\_g1\_i1\_4, TRIN-  
ITY\_DN9067\_c0\_g1\_i1\_4, TRIN-

---

---

ITY\_DN5787\_c0\_g1\_i1\_4, TRIN-  
ITY\_DN8486\_c0\_g1\_i1\_4, TRIN-  
ITY\_DN34113\_c0\_g1\_i1\_4, TRIN-  
ITY\_DN6589\_c0\_g1\_i1\_4, TRIN-  
ITY\_DN31030\_c0\_g1\_i1\_4, TRIN-  
ITY\_DN30875\_c0\_g1\_i1\_4, TRIN-  
ITY\_DN27258\_c0\_g1\_i1\_3, TRIN-  
ITY\_DN35991\_c0\_g1\_i1\_4, TRIN-  
ITY\_DN1129\_c0\_g1\_i1\_6, TRIN-  
ITY\_DN10754\_c0\_g1\_i1\_4, TRIN-  
ITY\_DN2047\_c0\_g1\_i2\_2, TRIN-  
ITY\_DN35716\_c0\_g1\_i1\_4, TRIN-  
ITY\_DN26770\_c0\_g1\_i1\_4, TRIN-  
ITY\_DN27536\_c0\_g1\_i1\_4, TRIN-  
ITY\_DN32243\_c0\_g1\_i1\_4, TRIN-  
ITY\_DN28951\_c0\_g1\_i1\_5, TRIN-  
ITY\_DN37299\_c0\_g1\_i1\_4, TRIN-  
ITY\_DN30300\_c0\_g1\_i1\_4, TRIN-  
ITY\_DN2191\_c0\_g1\_i1\_4, TRIN-  
ITY\_DN36754\_c0\_g1\_i1\_4, TRIN-  
ITY\_DN5025\_c0\_g1\_i2\_2, TRIN-  
ITY\_DN19706\_c0\_g1\_i1\_4, TRIN-  
ITY\_DN13304\_c0\_g1\_i2\_4, TRIN-  
ITY\_DN30604\_c0\_g1\_i1\_6, TRIN-  
ITY\_DN30753\_c0\_g1\_i1\_4, TRIN-  
ITY\_DN30604\_c0\_g1\_i1\_4, TRIN-  
ITY\_DN6328\_c0\_g1\_i1\_6, TRIN-  
ITY\_DN9983\_c0\_g1\_i1\_4, TRIN-  
ITY\_DN3255\_c0\_g1\_i1\_4, TRIN-  
ITY\_DN26251\_c0\_g1\_i1\_4, TRIN-  
ITY\_DN31202\_c0\_g1\_i1\_6, TRIN-  
ITY\_DN27566\_c0\_g1\_i1\_4, TRIN-  
ITY\_DN11018\_c0\_g1\_i1\_4, TRIN-  
ITY\_DN26008\_c0\_g1\_i1\_6, TRIN-  
ITY\_DN36231\_c0\_g1\_i1\_4, TRIN-  
ITY\_DN37276\_c0\_g1\_i1\_6, TRIN-  
ITY\_DN33065\_c0\_g1\_i1\_6, TRIN-

---

---

ITY\_DN17840\_c0\_g1\_i1\_4, TRIN-  
ITY\_DN27218\_c0\_g1\_i1\_4, TRIN-  
ITY\_DN26111\_c0\_g1\_i1\_4, TRIN-  
ITY\_DN27811\_c0\_g1\_i1\_6, TRIN-  
ITY\_DN15806\_c0\_g2\_i1\_4, TRIN-  
ITY\_DN6891\_c0\_g1\_i1\_6, TRIN-  
ITY\_DN6149\_c0\_g1\_i1\_6, TRIN-  
ITY\_DN30254\_c0\_g1\_i1\_4, TRIN-  
ITY\_DN16768\_c0\_g1\_i1\_4, TRIN-  
ITY\_DN13494\_c0\_g1\_i1\_6, TRIN-  
ITY\_DN18056\_c0\_g1\_i1\_4, TRIN-  
ITY\_DN10336\_c0\_g2\_i1\_4, TRIN-  
ITY\_DN29389\_c0\_g1\_i1\_4, TRIN-  
ITY\_DN3908\_c0\_g1\_i1\_4, TRIN-  
ITY\_DN28034\_c0\_g1\_i1\_3, TRIN-  
ITY\_DN14813\_c0\_g1\_i1\_4, TRIN-  
ITY\_DN32804\_c0\_g1\_i1\_4, TRIN-  
ITY\_DN5688\_c0\_g1\_i1\_4, TRIN-  
ITY\_DN33073\_c0\_g1\_i1\_4, TRIN-  
ITY\_DN36955\_c0\_g1\_i1\_6, TRIN-  
ITY\_DN7388\_c0\_g1\_i1\_6, TRIN-  
ITY\_DN28052\_c0\_g1\_i1\_4, TRIN-  
ITY\_DN36641\_c0\_g1\_i1\_4, TRIN-  
ITY\_DN32834\_c0\_g1\_i1\_4, TRIN-  
ITY\_DN16313\_c0\_g1\_i1\_4, TRIN-  
ITY\_DN34137\_c0\_g1\_i1\_4, TRIN-  
ITY\_DN30352\_c0\_g1\_i1\_6, TRIN-  
ITY\_DN34997\_c0\_g1\_i1\_6, TRIN-  
ITY\_DN12403\_c0\_g1\_i1\_4, TRIN-  
ITY\_DN29811\_c0\_g1\_i1\_6, TRIN-  
ITY\_DN28652\_c0\_g1\_i1\_4, TRIN-  
ITY\_DN30904\_c0\_g1\_i1\_4, TRIN-  
ITY\_DN14947\_c0\_g1\_i1\_4, TRIN-  
ITY\_DN35240\_c0\_g1\_i1\_4, TRIN-  
ITY\_DN31839\_c0\_g1\_i1\_6, TRIN-  
ITY\_DN18488\_c0\_g1\_i1\_4, TRIN-  
ITY\_DN35586\_c0\_g1\_i1\_4, TRIN-

---

|                           |                                               |     |          |             |  |                                                                                                                                                                                                                                                                                                                                                                                                                                                                                                                                                                                                                                                                      |
|---------------------------|-----------------------------------------------|-----|----------|-------------|--|----------------------------------------------------------------------------------------------------------------------------------------------------------------------------------------------------------------------------------------------------------------------------------------------------------------------------------------------------------------------------------------------------------------------------------------------------------------------------------------------------------------------------------------------------------------------------------------------------------------------------------------------------------------------|
|                           |                                               |     |          |             |  | ITY_DN12617_c0_g1_i2_4, TRIN-<br>ITY_DN10675_c0_g1_i1_4, TRIN-<br>ITY_DN36306_c0_g1_i1_4, TRIN-<br>ITY_DN346_c0_g1_i1_4, TRIN-<br>ITY_DN30110_c0_g1_i1_4, TRIN-<br>ITY_DN29690_c0_g1_i1_2, TRIN-<br>ITY_DN35718_c0_g1_i1_4, TRIN-<br>ITY_DN34291_c0_g1_i1_4, TRIN-<br>ITY_DN14747_c0_g1_i1_6, TRIN-<br>ITY_DN9318_c0_g1_i1_4, TRIN-<br>ITY_DN29568_c0_g1_i1_4, TRIN-<br>ITY_DN25759_c0_g2_i1_6, TRIN-<br>ITY_DN20949_c0_g1_i1_4, TRIN-<br>ITY_DN10198_c0_g2_i1_4, TRIN-<br>ITY_DN4058_c0_g1_i1_6, TRIN-<br>ITY_DN36727_c0_g1_i1_4, TRIN-<br>ITY_DN28569_c0_g1_i1_6, TRIN-<br>ITY_DN14709_c0_g1_i1_5, TRIN-<br>ITY_DN2936_c0_g1_i1_4, TRIN-<br>ITY_DN36766_c0_g1_i1_4 |
| 03020 RNA polymer-<br>ase | A09120 Genetic<br>Information Pro-<br>cessing | 182 | 8.10E-04 | 1.179652998 |  | TRINITY_DN30255_c0_g1_i1_4,<br>TRINITY_DN25720_c0_g2_i1_4,<br>TRINITY_DN32182_c0_g1_i1_4,<br>TRINITY_DN26817_c0_g1_i1_4,<br>TRINITY_DN35285_c0_g1_i1_4,<br>TRINITY_DN36276_c0_g1_i1_4,<br>TRINITY_DN20918_c0_g1_i1_4,<br>TRINITY_DN14215_c0_g1_i1_4,<br>TRINITY_DN12061_c0_g1_i1_4,<br>TRINITY_DN35364_c0_g1_i1_4,<br>TRINITY_DN20376_c0_g3_i1_4,<br>TRINITY_DN16863_c0_g1_i1_4,<br>TRINITY_DN27369_c0_g1_i1_4,<br>TRINITY_DN25759_c0_g1_i2_6,<br>TRINITY_DN5471_c0_g1_i1_6, TRIN-<br>ITY_DN13697_c0_g1_i1_4, TRIN-                                                                                                                                                  |

---

ITY\_DN34538\_c0\_g1\_i1\_4, TRIN-  
ITY\_DN34330\_c0\_g1\_i1\_4, TRIN-  
ITY\_DN27594\_c0\_g1\_i1\_3, TRIN-  
ITY\_DN30179\_c0\_g1\_i1\_6, TRIN-  
ITY\_DN13485\_c0\_g2\_i1\_6, TRIN-  
ITY\_DN13667\_c0\_g2\_i1\_6, TRIN-  
ITY\_DN28906\_c0\_g1\_i1\_4, TRIN-  
ITY\_DN27637\_c0\_g1\_i1\_4, TRIN-  
ITY\_DN36002\_c0\_g1\_i1\_4, TRIN-  
ITY\_DN30434\_c0\_g1\_i1\_4, TRIN-  
ITY\_DN32780\_c0\_g1\_i1\_6, TRIN-  
ITY\_DN3051\_c0\_g1\_i2\_4, TRIN-  
ITY\_DN38907\_c0\_g1\_i1\_6, TRIN-  
ITY\_DN16241\_c0\_g1\_i1\_4, TRIN-  
ITY\_DN16771\_c0\_g1\_i1\_4, TRIN-  
ITY\_DN36191\_c0\_g1\_i1\_5, TRIN-  
ITY\_DN31332\_c0\_g1\_i1\_4, TRIN-  
ITY\_DN28886\_c0\_g1\_i1\_4, TRIN-  
ITY\_DN35014\_c0\_g1\_i1\_4, TRIN-  
ITY\_DN19169\_c0\_g1\_i1\_4, TRIN-  
ITY\_DN26722\_c0\_g1\_i1\_4, TRIN-  
ITY\_DN37118\_c0\_g1\_i1\_4, TRIN-  
ITY\_DN35334\_c0\_g1\_i1\_6, TRIN-  
ITY\_DN32522\_c0\_g1\_i1\_4, TRIN-  
ITY\_DN8776\_c0\_g1\_i1\_4, TRIN-  
ITY\_DN16779\_c0\_g1\_i1\_4, TRIN-  
ITY\_DN30595\_c0\_g1\_i1\_6, TRIN-  
ITY\_DN33144\_c0\_g1\_i1\_6, TRIN-  
ITY\_DN36814\_c0\_g1\_i1\_4, TRIN-  
ITY\_DN725\_c0\_g1\_i2\_3, TRIN-  
ITY\_DN34934\_c0\_g1\_i1\_4, TRIN-  
ITY\_DN31793\_c0\_g1\_i1\_4, TRIN-  
ITY\_DN17127\_c0\_g1\_i1\_4, TRIN-  
ITY\_DN23064\_c0\_g1\_i1\_4, TRIN-  
ITY\_DN6610\_c0\_g1\_i1\_4, TRIN-  
ITY\_DN16329\_c0\_g2\_i1\_6, TRIN-  
ITY\_DN8590\_c0\_g1\_i1\_4, TRIN-

---

---

ITY\_DN10031\_c0\_g1\_i1\_4, TRIN-  
ITY\_DN1829\_c0\_g1\_i1\_5, TRIN-  
ITY\_DN27649\_c0\_g1\_i1\_4, TRIN-  
ITY\_DN33746\_c0\_g1\_i1\_6, TRIN-  
ITY\_DN29455\_c0\_g1\_i1\_4, TRIN-  
ITY\_DN34648\_c0\_g1\_i1\_4, TRIN-  
ITY\_DN37452\_c0\_g1\_i1\_6, TRIN-  
ITY\_DN33306\_c0\_g1\_i1\_4, TRIN-  
ITY\_DN33907\_c0\_g1\_i1\_6, TRIN-  
ITY\_DN4470\_c0\_g1\_i1\_4, TRIN-  
ITY\_DN38092\_c0\_g1\_i1\_6, TRIN-  
ITY\_DN34868\_c0\_g1\_i1\_4, TRIN-  
ITY\_DN33713\_c0\_g1\_i1\_6, TRIN-  
ITY\_DN19233\_c0\_g1\_i2\_4, TRIN-  
ITY\_DN34048\_c0\_g1\_i1\_4, TRIN-  
ITY\_DN29340\_c0\_g1\_i1\_6, TRIN-  
ITY\_DN5155\_c0\_g1\_i1\_6, TRIN-  
ITY\_DN28722\_c0\_g1\_i1\_6, TRIN-  
ITY\_DN34741\_c0\_g1\_i1\_4, TRIN-  
ITY\_DN34287\_c0\_g1\_i1\_4, TRIN-  
ITY\_DN30011\_c0\_g1\_i1\_4, TRIN-  
ITY\_DN33944\_c0\_g1\_i1\_4, TRIN-  
ITY\_DN19175\_c0\_g1\_i1\_4, TRIN-  
ITY\_DN37243\_c0\_g1\_i1\_4, TRIN-  
ITY\_DN27534\_c0\_g1\_i1\_4, TRIN-  
ITY\_DN11525\_c0\_g1\_i1\_4, TRIN-  
ITY\_DN25144\_c1\_g2\_i3\_4, TRIN-  
ITY\_DN618\_c0\_g1\_i1\_4, TRIN-  
ITY\_DN32394\_c0\_g1\_i1\_4, TRIN-  
ITY\_DN31327\_c0\_g1\_i1\_6, TRIN-  
ITY\_DN27161\_c4\_g1\_i1\_6, TRIN-  
ITY\_DN25554\_c1\_g3\_i4\_4, TRIN-  
ITY\_DN12830\_c0\_g1\_i2\_6, TRIN-  
ITY\_DN35711\_c0\_g1\_i1\_4, TRIN-  
ITY\_DN9067\_c0\_g1\_i1\_4, TRIN-  
ITY\_DN5787\_c0\_g1\_i1\_4, TRIN-  
ITY\_DN8486\_c0\_g1\_i1\_4, TRIN-

---



---

ITY\_DN34113\_c0\_g1\_i1\_4, TRIN-  
ITY\_DN6589\_c0\_g1\_i1\_4, TRIN-  
ITY\_DN31030\_c0\_g1\_i1\_4, TRIN-  
ITY\_DN30875\_c0\_g1\_i1\_4, TRIN-  
ITY\_DN27258\_c0\_g1\_i1\_3, TRIN-  
ITY\_DN35991\_c0\_g1\_i1\_4, TRIN-  
ITY\_DN1129\_c0\_g1\_i1\_6, TRIN-  
ITY\_DN10754\_c0\_g1\_i1\_4, TRIN-  
ITY\_DN2047\_c0\_g1\_i2\_2, TRIN-  
ITY\_DN35716\_c0\_g1\_i1\_4, TRIN-  
ITY\_DN26770\_c0\_g1\_i1\_4, TRIN-  
ITY\_DN27536\_c0\_g1\_i1\_4, TRIN-  
ITY\_DN32243\_c0\_g1\_i1\_4, TRIN-  
ITY\_DN28951\_c0\_g1\_i1\_5, TRIN-  
ITY\_DN37299\_c0\_g1\_i1\_4, TRIN-  
ITY\_DN30300\_c0\_g1\_i1\_4, TRIN-  
ITY\_DN2191\_c0\_g1\_i1\_4, TRIN-  
ITY\_DN36754\_c0\_g1\_i1\_4, TRIN-  
ITY\_DN5025\_c0\_g1\_i2\_2, TRIN-  
ITY\_DN19706\_c0\_g1\_i1\_4, TRIN-  
ITY\_DN13304\_c0\_g1\_i2\_4, TRIN-  
ITY\_DN30604\_c0\_g1\_i1\_6, TRIN-  
ITY\_DN30753\_c0\_g1\_i1\_4, TRIN-  
ITY\_DN30604\_c0\_g1\_i1\_4, TRIN-  
ITY\_DN6328\_c0\_g1\_i1\_6, TRIN-  
ITY\_DN9983\_c0\_g1\_i1\_4, TRIN-  
ITY\_DN3255\_c0\_g1\_i1\_4, TRIN-  
ITY\_DN26251\_c0\_g1\_i1\_4, TRIN-  
ITY\_DN31202\_c0\_g1\_i1\_6, TRIN-  
ITY\_DN27566\_c0\_g1\_i1\_4, TRIN-  
ITY\_DN11018\_c0\_g1\_i1\_4, TRIN-  
ITY\_DN26008\_c0\_g1\_i1\_6, TRIN-  
ITY\_DN36231\_c0\_g1\_i1\_4, TRIN-  
ITY\_DN37276\_c0\_g1\_i1\_6, TRIN-  
ITY\_DN33065\_c0\_g1\_i1\_6, TRIN-  
ITY\_DN17840\_c0\_g1\_i1\_4, TRIN-  
ITY\_DN27218\_c0\_g1\_i1\_4, TRIN-

---

---

ITY\_DN26111\_c0\_g1\_i1\_4, TRIN-  
ITY\_DN27811\_c0\_g1\_i1\_6, TRIN-  
ITY\_DN15806\_c0\_g2\_i1\_4, TRIN-  
ITY\_DN6891\_c0\_g1\_i1\_6, TRIN-  
ITY\_DN6149\_c0\_g1\_i1\_6, TRIN-  
ITY\_DN30254\_c0\_g1\_i1\_4, TRIN-  
ITY\_DN16768\_c0\_g1\_i1\_4, TRIN-  
ITY\_DN13494\_c0\_g1\_i1\_6, TRIN-  
ITY\_DN18056\_c0\_g1\_i1\_4, TRIN-  
ITY\_DN10336\_c0\_g2\_i1\_4, TRIN-  
ITY\_DN29389\_c0\_g1\_i1\_4, TRIN-  
ITY\_DN3908\_c0\_g1\_i1\_4, TRIN-  
ITY\_DN28034\_c0\_g1\_i1\_3, TRIN-  
ITY\_DN14813\_c0\_g1\_i1\_4, TRIN-  
ITY\_DN32804\_c0\_g1\_i1\_4, TRIN-  
ITY\_DN5688\_c0\_g1\_i1\_4, TRIN-  
ITY\_DN33073\_c0\_g1\_i1\_4, TRIN-  
ITY\_DN36955\_c0\_g1\_i1\_6, TRIN-  
ITY\_DN7388\_c0\_g1\_i1\_6, TRIN-  
ITY\_DN28052\_c0\_g1\_i1\_4, TRIN-  
ITY\_DN36641\_c0\_g1\_i1\_4, TRIN-  
ITY\_DN32834\_c0\_g1\_i1\_4, TRIN-  
ITY\_DN16313\_c0\_g1\_i1\_4, TRIN-  
ITY\_DN34137\_c0\_g1\_i1\_4, TRIN-  
ITY\_DN30352\_c0\_g1\_i1\_6, TRIN-  
ITY\_DN34997\_c0\_g1\_i1\_6, TRIN-  
ITY\_DN12403\_c0\_g1\_i1\_4, TRIN-  
ITY\_DN29811\_c0\_g1\_i1\_6, TRIN-  
ITY\_DN28652\_c0\_g1\_i1\_4, TRIN-  
ITY\_DN30904\_c0\_g1\_i1\_4, TRIN-  
ITY\_DN14947\_c0\_g1\_i1\_4, TRIN-  
ITY\_DN35240\_c0\_g1\_i1\_4, TRIN-  
ITY\_DN31839\_c0\_g1\_i1\_6, TRIN-  
ITY\_DN18488\_c0\_g1\_i1\_4, TRIN-  
ITY\_DN35586\_c0\_g1\_i1\_4, TRIN-  
ITY\_DN12617\_c0\_g1\_i2\_4, TRIN-  
ITY\_DN10675\_c0\_g1\_i1\_4, TRIN-

---

|                               |                   |    |             |            |  |                                                                                                                                                                                                                                                                                                                                                                                                                                                                                                                                                                                                    |
|-------------------------------|-------------------|----|-------------|------------|--|----------------------------------------------------------------------------------------------------------------------------------------------------------------------------------------------------------------------------------------------------------------------------------------------------------------------------------------------------------------------------------------------------------------------------------------------------------------------------------------------------------------------------------------------------------------------------------------------------|
|                               |                   |    |             |            |  | ITY_DN36306_c0_g1_i1_4, TRIN-<br>ITY_DN346_c0_g1_i1_4, TRIN-<br>ITY_DN30110_c0_g1_i1_4, TRIN-<br>ITY_DN29690_c0_g1_i1_2, TRIN-<br>ITY_DN35718_c0_g1_i1_4, TRIN-<br>ITY_DN34291_c0_g1_i1_4, TRIN-<br>ITY_DN14747_c0_g1_i1_6, TRIN-<br>ITY_DN9318_c0_g1_i1_4, TRIN-<br>ITY_DN29568_c0_g1_i1_4, TRIN-<br>ITY_DN25759_c0_g2_i1_6, TRIN-<br>ITY_DN20949_c0_g1_i1_4, TRIN-<br>ITY_DN10198_c0_g2_i1_4, TRIN-<br>ITY_DN4058_c0_g1_i1_6, TRIN-<br>ITY_DN36727_c0_g1_i1_4, TRIN-<br>ITY_DN28569_c0_g1_i1_6, TRIN-<br>ITY_DN14709_c0_g1_i1_5, TRIN-<br>ITY_DN2936_c0_g1_i1_4, TRIN-<br>ITY_DN36766_c0_g1_i1_4 |
| 00561 Glycerolipid metabolism | A09100 Metabolism | 20 | 0.002781088 | 1.96939046 |  | TRINITY_DN35640_c0_g1_i1_4,<br>TRINITY_DN31687_c0_g1_i1_4,<br>TRINITY_DN127_c0_g2_i1_6, TRIN-<br>ITY_DN28649_c0_g1_i1_4, TRIN-<br>ITY_DN26605_c0_g1_i1_4, TRIN-<br>ITY_DN3062_c0_g2_i1_4, TRIN-<br>ITY_DN31880_c0_g1_i1_4, TRIN-<br>ITY_DN35824_c0_g1_i1_4, TRIN-<br>ITY_DN30746_c0_g1_i1_4, TRIN-<br>ITY_DN33593_c0_g1_i1_4, TRIN-<br>ITY_DN29435_c0_g1_i1_6, TRIN-<br>ITY_DN30161_c0_g1_i1_6, TRIN-<br>ITY_DN3293_c0_g1_i1_4, TRIN-<br>ITY_DN37346_c0_g1_i1_4, TRIN-<br>ITY_DN27451_c0_g1_i1_4, TRIN-<br>ITY_DN4679_c0_g1_i1_6, TRIN-<br>ITY_DN27394_c0_g1_i1_4, TRIN-                           |

|                                             |                                             |    |             |             |  |                                                                                                                                                                                                                                                                                                                                                                                                                                                                                                                                                                                                                                                                                                                                                                                                                                          |
|---------------------------------------------|---------------------------------------------|----|-------------|-------------|--|------------------------------------------------------------------------------------------------------------------------------------------------------------------------------------------------------------------------------------------------------------------------------------------------------------------------------------------------------------------------------------------------------------------------------------------------------------------------------------------------------------------------------------------------------------------------------------------------------------------------------------------------------------------------------------------------------------------------------------------------------------------------------------------------------------------------------------------|
|                                             |                                             |    |             |             |  | ITY_DN38780_c0_g1_i1_6, TRINITY_DN31588_c0_g1_i1_4, TRINITY_DN27308_c0_g1_i1_4                                                                                                                                                                                                                                                                                                                                                                                                                                                                                                                                                                                                                                                                                                                                                           |
| 04070 Phosphatidylinositol signaling system | A09130 Environmental Information Processing | 2  | 0.005709077 | 15.03301384 |  | TRINITY_DN35640_c0_g1_i1_4, TRINITY_DN27308_c0_g1_i1_4                                                                                                                                                                                                                                                                                                                                                                                                                                                                                                                                                                                                                                                                                                                                                                                   |
|                                             |                                             |    |             |             |  | TRINITY_DN28340_c0_g1_i1_4, TRINITY_DN35675_c0_g1_i1_4, TRINITY_DN35781_c0_g1_i1_4, TRINITY_DN29389_c0_g1_i1_4, TRINITY_DN32766_c0_g1_i1_4, TRINITY_DN31108_c0_g1_i1_4, TRINITY_DN27558_c0_g1_i1_4, TRINITY_DN8825_c0_g2_i1_4, TRINITY_DN33073_c0_g1_i1_4, TRINITY_DN29435_c0_g1_i1_6, TRINITY_DN29733_c0_g1_i1_4, TRINITY_DN27651_c0_g1_i1_6, TRINITY_DN35022_c0_g1_i1_4, TRINITY_DN36253_c0_g1_i1_4, TRINITY_DN32951_c0_g1_i1_6, TRINITY_DN26955_c0_g1_i1_4, TRINITY_DN35347_c0_g1_i1_4, TRINITY_DN34048_c0_g1_i1_4, TRINITY_DN33937_c0_g1_i1_4, TRINITY_DN5158_c0_g2_i1_4, TRINITY_DN33662_c0_g1_i1_6, TRINITY_DN28916_c0_g1_i1_4, TRINITY_DN28568_c0_g1_i1_4, TRINITY_DN24015_c0_g1_i1_6, TRINITY_DN31537_c0_g1_i1_4, TRINITY_DN37684_c0_g1_i1_4, TRINITY_DN36782_c0_g1_i1_4, TRINITY_DN34962_c0_g1_i1_4, TRINITY_DN30138_c0_g1_i1_4 |
| 00562 Inositol phosphate metabolism         | A09100 Metabolism                           | 29 | 0.007571483 | 1.602784564 |  |                                                                                                                                                                                                                                                                                                                                                                                                                                                                                                                                                                                                                                                                                                                                                                                                                                          |



|                          |                                       |    |             |             |                                                                                                                                                                                                                                                                                                                                                                                                                                                                                                                                                                                                                                                                                                                                                    |
|--------------------------|---------------------------------------|----|-------------|-------------|----------------------------------------------------------------------------------------------------------------------------------------------------------------------------------------------------------------------------------------------------------------------------------------------------------------------------------------------------------------------------------------------------------------------------------------------------------------------------------------------------------------------------------------------------------------------------------------------------------------------------------------------------------------------------------------------------------------------------------------------------|
|                          |                                       |    |             |             | ITY_DN29512_c0_g1_i1_4, TRINITY_DN26616_c0_g1_i1_4, TRINITY_DN26835_c0_g1_i1_4                                                                                                                                                                                                                                                                                                                                                                                                                                                                                                                                                                                                                                                                     |
|                          |                                       |    |             |             | TRINITY_DN8568_c0_g1_i1_4, TRINITY_DN33313_c0_g1_i1_4, TRINITY_DN28880_c0_g1_i1_4, TRINITY_DN36395_c0_g1_i1_4, TRINITY_DN29693_c0_g1_i1_4, TRINITY_DN31947_c0_g1_i1_4, TRINITY_DN29512_c0_g1_i1_4, TRINITY_DN26616_c0_g1_i1_4, TRINITY_DN26835_c0_g1_i1_4                                                                                                                                                                                                                                                                                                                                                                                                                                                                                          |
| 03050 Proteasome         | A09120 Genetic Information Processing | 9  | 0.010835471 | 2.445128758 |                                                                                                                                                                                                                                                                                                                                                                                                                                                                                                                                                                                                                                                                                                                                                    |
|                          |                                       |    |             |             | TRINITY_DN31687_c0_g1_i1_4, TRINITY_DN127_c0_g2_i1_6, TRINITY_DN3062_c0_g2_i1_4, TRINITY_DN31880_c0_g1_i1_4, TRINITY_DN33884_c0_g1_i1_4, TRINITY_DN30746_c0_g1_i1_4, TRINITY_DN29435_c0_g1_i1_6, TRINITY_DN30161_c0_g1_i1_6, TRINITY_DN3293_c0_g1_i1_4, TRINITY_DN37346_c0_g1_i1_4, TRINITY_DN27451_c0_g1_i1_4, TRINITY_DN27394_c0_g1_i1_4, TRINITY_DN38780_c0_g1_i1_6, TRINITY_DN31588_c0_g1_i1_4, TRINITY_DN35640_c0_g1_i1_4, TRINITY_DN28649_c0_g1_i1_4, TRINITY_DN26605_c0_g1_i1_4, TRINITY_DN31949_c0_g1_i1_4, TRINITY_DN29834_c0_g1_i1_6, TRINITY_DN29924_c0_g1_i1_4, TRINITY_DN35533_c0_g1_i1_4, TRINITY_DN35824_c0_g1_i1_4, TRINITY_DN29940_c0_g1_i1_4, TRINITY_DN29512_c0_g1_i1_4, TRINITY_DN26616_c0_g1_i1_4, TRINITY_DN26835_c0_g1_i1_4 |
| B 09103 Lipid metabolism | A09100 Metabolism                     | 28 | 0.017124862 | 1.517756205 |                                                                                                                                                                                                                                                                                                                                                                                                                                                                                                                                                                                                                                                                                                                                                    |

ITY\_DN28926\_c0\_g1\_i1\_4, TRINITY\_DN33593\_c0\_g1\_i1\_4, TRINITY\_DN4679\_c0\_g1\_i1\_6, TRINITY\_DN27308\_c0\_g1\_i1\_4, TRINITY\_DN37350\_c0\_g1\_i1\_4

**Table S2.** Graphs present 14 KEGG pathways with the highest transcriptional variations, out of the up-regulated DEGs in *Paspalum vaginatum*.

| Term Name                                 | MainClass                | GeneHitsInSelectedSet | p-value  | enrichFactor | GeneListInSelectedSets                                                                                                                                                                                                                                                                                                                                                                                                           |
|-------------------------------------------|--------------------------|-----------------------|----------|--------------|----------------------------------------------------------------------------------------------------------------------------------------------------------------------------------------------------------------------------------------------------------------------------------------------------------------------------------------------------------------------------------------------------------------------------------|
| 03016 Transfer RNA biogenesis             | A09180 Brite Hierarchies | 15                    | 8.26E-06 | 0.41204      | TRINITY_DN17249_c0_g1_i1_2, TRINITY_DN26978_c0_g1_i1_1, TRINITY_DN10409_c0_g1_i4_1, TRINITY_DN7420_c0_g1_i1_2, TRINITY_DN18386_c0_g1_i4_2, TRINITY_DN25122_c0_g1_i8_2, TRINITY_DN8697_c0_g1_i1_2, TRINITY_DN23660_c0_g2_i1_2, TRINITY_DN24792_c0_g1_i18_2, TRINITY_DN21259_c0_g1_i6_5, TRINITY_DN13877_c0_g1_i1_2, TRINITY_DN8539_c0_g1_i1_3, TRINITY_DN11896_c0_g1_i4_2, TRINITY_DN17375_c0_g1_i1_3, TRINITY_DN19525_c1_g1_i1_1 |
| 00660 C5-Branched dibasic acid metabolism | A09100 Metabolism        | 9                     | 2.89E-05 | 0.43110      | TRINITY_DN22555_c0_g2_i7_3, TRINITY_DN23869_c1_g1_i9_2, TRINITY_DN15585_c0_g1_i2_6, TRINITY_DN9193_c0_g1_i1_6, TRINITY_DN22470_c0_g1_i4_2, TRINITY_DN17831_c0_g1_i1_3, TRINITY_DN24324_c0_g1_i1_5, TRINITY_DN21552_c0_g1_i2_3, TRINITY_DN21482_c0_g1_i3_3                                                                                                                                                                        |

|                                                   |                   |    |          |          |                                                                                                                                                                                                                                                                                                                                                       |
|---------------------------------------------------|-------------------|----|----------|----------|-------------------------------------------------------------------------------------------------------------------------------------------------------------------------------------------------------------------------------------------------------------------------------------------------------------------------------------------------------|
| 00290 Valine, leucine and isoleucine biosynthesis | A09100 Metabolism | 11 | 7.36E-05 | 0.431108 | TRINITY_DN22555_c0_g2_i7_3,<br>TRINITY_DN23869_c1_g1_i9_2,<br>TRINITY_DN15585_c0_g1_i2_6,<br>TRINITY_DN9193_c0_g1_i1_6,<br>TRINITY_DN22470_c0_g1_i4_2,<br>TRINITY_DN17831_c0_g1_i1_3,<br>TRINITY_DN24061_c0_g1_i1_2,<br>TRINITY_DN25983_c0_g3_i1_5,<br>TRINITY_DN24324_c0_g1_i1_5,<br>TRINITY_DN21552_c0_g1_i2_3,<br>TRINITY_DN21482_c0_g1_i3_3       |
|                                                   |                   |    |          |          | TRINITY_DN21352_c0_g1_i32_1,<br>TRINITY_DN23869_c1_g1_i9_2,<br>TRINITY_DN15585_c0_g1_i2_6,<br>TRINITY_DN22470_c0_g1_i4_2,<br>TRINITY_DN9193_c0_g1_i1_6,<br>TRINITY_DN21326_c0_g1_i17_3,<br>TRINITY_DN17831_c0_g1_i1_3,<br>TRINITY_DN21720_c0_g1_i8_3,<br>TRINITY_DN25983_c0_g3_i1_5,<br>TRINITY_DN24324_c0_g1_i1_5,<br>TRINITY_DN21482_c0_g1_i3_3,    |
| B 09105 Amino acid metabolism                     | A09100 Metabolism | 22 | 0.007248 | 0.431108 | TRINITY_DN22555_c0_g2_i7_3,<br>TRINITY_DN18616_c0_g1_i9_2,<br>TRINITY_DN23809_c0_g4_i8_3,<br>TRINITY_DN25467_c0_g1_i10_2,<br>TRINITY_DN25579_c0_g1_i7_6,<br>TRINITY_DN24061_c0_g1_i1_2,<br>TRINITY_DN25240_c0_g1_i14_2,<br>TRINITY_DN22255_c0_g2_i20_1,<br>TRINITY_DN21552_c0_g1_i2_3,<br>TRINITY_DN23285_c0_g1_i10_2,<br>TRINITY_DN24132_c0_g2_i11_2 |
| B 09101 Carbohydrate metabolism                   | A09100 Metabolism | 19 | 0.006482 | 0.423887 | TRINITY_DN21352_c0_g1_i32_1,<br>TRINITY_DN23869_c1_g1_i9_2,<br>TRINITY_DN15585_c0_g1_i2_6,                                                                                                                                                                                                                                                            |



|                                                      |                        |    |          |          |  |                                                                                                                                                                                                                                                                                                                                                                                                                                                                                                                 |
|------------------------------------------------------|------------------------|----|----------|----------|--|-----------------------------------------------------------------------------------------------------------------------------------------------------------------------------------------------------------------------------------------------------------------------------------------------------------------------------------------------------------------------------------------------------------------------------------------------------------------------------------------------------------------|
|                                                      |                        |    |          |          |  | TRINITY_DN16544_c0_g1_i2_3,<br>TRINITY_DN24039_c1_g1_i16_2,<br>TRINITY_DN22470_c0_g1_i4_2,<br>TRINITY_DN9193_c0_g1_i1_6,<br>TRINITY_DN21326_c0_g1_i17_3,<br>TRINITY_DN17831_c0_g1_i1_3,<br>TRINITY_DN23953_c0_g1_i19_2,<br>TRINITY_DN24324_c0_g1_i1_5,<br>TRINITY_DN21482_c0_g1_i3_3,<br>TRINITY_DN22555_c0_g2_i7_3,<br>TRINITY_DN25042_c0_g2_i2_2,<br>TRINITY_DN17068_c0_g1_i5_1,<br>TRINITY_DN21552_c0_g1_i2_3,<br>TRINITY_DN23285_c0_g1_i10_2,<br>TRINITY_DN19877_c0_g1_i1_1,<br>TRINITY_DN24132_c0_g2_i11_2 |
| B 09108 Metabolism<br>of cofactors and vita-<br>mins | A09100 Metabo-<br>lism | 14 | 0.005467 | 0.744515 |  | TRINITY_DN23869_c1_g1_i9_2,<br>TRINITY_DN24722_c0_g1_i24_2,<br>TRINITY_DN22470_c0_g1_i4_2,<br>TRINITY_DN21326_c0_g1_i17_3,<br>TRINITY_DN25983_c0_g3_i1_5,<br>TRINITY_DN21482_c0_g1_i3_3,<br>TRINITY_DN22555_c0_g2_i7_3,<br>TRINITY_DN23809_c0_g4_i8_3,<br>TRINITY_DN20232_c0_g1_i3_4,<br>TRINITY_DN25579_c0_g1_i7_6,<br>TRINITY_DN24061_c0_g1_i1_2,<br>TRINITY_DN20392_c0_g1_i3_4,<br>TRINITY_DN22255_c0_g2_i20_1,<br>TRINITY_DN23285_c0_g1_i10_2                                                               |
| A09100 Metabolism                                    | A09100 Metabo-<br>lism | 41 | 0.017723 | 0.795616 |  | TRINITY_DN21352_c0_g1_i32_1,<br>TRINITY_DN24039_c1_g1_i16_2,<br>TRINITY_DN21326_c0_g1_i17_3,<br>TRINITY_DN17831_c0_g1_i1_3,<br>TRINITY_DN21720_c0_g1_i8_3,<br>TRINITY_DN23953_c0_g1_i19_2,                                                                                                                                                                                                                                                                                                                      |

|                                                                  |                        |   |          |          |                                                                                                                                                                                                                                                                                                                                                                                                                                                                                                                                                                                                                                                                                                                                                                                                                                                                                                                                                                                                                                                                                                                               |
|------------------------------------------------------------------|------------------------|---|----------|----------|-------------------------------------------------------------------------------------------------------------------------------------------------------------------------------------------------------------------------------------------------------------------------------------------------------------------------------------------------------------------------------------------------------------------------------------------------------------------------------------------------------------------------------------------------------------------------------------------------------------------------------------------------------------------------------------------------------------------------------------------------------------------------------------------------------------------------------------------------------------------------------------------------------------------------------------------------------------------------------------------------------------------------------------------------------------------------------------------------------------------------------|
|                                                                  |                        |   |          |          | TRINITY_DN24198_c0_g4_i1_2,<br>TRINITY_DN21482_c0_g1_i3_3,<br>TRINITY_DN16223_c0_g1_i8_1,<br>TRINITY_DN22555_c0_g2_i7_3,<br>TRINITY_DN25042_c0_g2_i2_2,<br>TRINITY_DN23809_c0_g4_i8_3,<br>TRINITY_DN20232_c0_g1_i3_4,<br>TRINITY_DN24104_c7_g1_i3_3,<br>TRINITY_DN24061_c0_g1_i1_2,<br>TRINITY_DN23285_c0_g1_i10_2,<br>TRINITY_DN24082_c1_g2_i15_3,<br>TRINITY_DN24132_c0_g2_i11_2,<br>TRINITY_DN23869_c1_g1_i9_2,<br>TRINITY_DN15585_c0_g1_i2_6,<br>TRINITY_DN16544_c0_g1_i2_3,<br>TRINITY_DN22934_c0_g1_i2_2,<br>TRINITY_DN8538_c0_g1_i2_2,<br>TRINITY_DN23416_c0_g1_i9_3,<br>TRINITY_DN24722_c0_g1_i24_2,<br>TRINITY_DN22470_c0_g1_i4_2,<br>TRINITY_DN9193_c0_g1_i1_6,<br>TRINITY_DN21684_c0_g1_i3_3,<br>TRINITY_DN25983_c0_g3_i1_5,<br>TRINITY_DN24324_c0_g1_i1_5,<br>TRINITY_DN19096_c0_g4_i1_1,<br>TRINITY_DN18616_c0_g1_i9_2,<br>TRINITY_DN17068_c0_g1_i5_1,<br>TRINITY_DN25467_c0_g1_i10_2,<br>TRINITY_DN25579_c0_g1_i7_6,<br>TRINITY_DN25240_c0_g1_i14_2,<br>TRINITY_DN20392_c0_g1_i3_4,<br>TRINITY_DN22709_c0_g1_i6_3,<br>TRINITY_DN22255_c0_g2_i20_1,<br>TRINITY_DN21552_c0_g1_i2_3,<br>TRINITY_DN19877_c0_g1_i1_1 |
| 00130 Ubiquinone<br>and other terpenoid-<br>quinone biosynthesis | A09100 Metabo-<br>lism | 2 | 0.032161 | 0.243044 | TRINITY_DN24722_c0_g1_i24_2,<br>TRINITY_DN20232_c0_g1_i3_4                                                                                                                                                                                                                                                                                                                                                                                                                                                                                                                                                                                                                                                                                                                                                                                                                                                                                                                                                                                                                                                                    |

|                                                           |                   |   |          |          |                                                                                                                                                                                                                       |
|-----------------------------------------------------------|-------------------|---|----------|----------|-----------------------------------------------------------------------------------------------------------------------------------------------------------------------------------------------------------------------|
| 00620 Pyruvate metabolism                                 | A09100 Metabolism | 5 | 0.027258 | 0.305277 | TRINITY_DN23869_c1_g1_i9_2,<br>TRINITY_DN16544_c0_g1_i2_3,<br>TRINITY_DN17068_c0_g1_i5_1,<br>TRINITY_DN22470_c0_g1_i4_2,<br>TRINITY_DN21482_c0_g1_i3_3                                                                |
| 00710 Carbon fixation in photosynthetic organisms         | A09100 Metabolism | 5 | 0.027258 | 0.637771 | TRINITY_DN23869_c1_g1_i9_2,<br>TRINITY_DN16544_c0_g1_i2_3,<br>TRINITY_DN17068_c0_g1_i5_1,<br>TRINITY_DN22470_c0_g1_i4_2,<br>TRINITY_DN21482_c0_g1_i3_3                                                                |
| B 09106 Metabolism of other amino acids                   | A09100 Metabolism | 3 | 0.079691 | 0.632437 | TRINITY_DN24039_c1_g1_i16_2,<br>TRINITY_DN21326_c0_g1_i17_3,<br>TRINITY_DN23285_c0_g1_i10_2                                                                                                                           |
| 00790 Folate biosynthesis                                 | A09100 Metabolism | 7 | 0.04543  | 0.741387 | TRINITY_DN22555_c0_g2_i7_3,<br>TRINITY_DN23869_c1_g1_i9_2,<br>TRINITY_DN23809_c0_g4_i8_3,<br>TRINITY_DN22470_c0_g1_i4_2,<br>TRINITY_DN25579_c0_g1_i7_6,<br>TRINITY_DN22255_c0_g2_i20_1,<br>TRINITY_DN21482_c0_g1_i3_3 |
| 00360 Phenylalanine metabolism                            | A09100 Metabolism | 7 | 0.04543  | 0.75406  | TRINITY_DN22555_c0_g2_i7_3,<br>TRINITY_DN23869_c1_g1_i9_2,<br>TRINITY_DN23809_c0_g4_i8_3,<br>TRINITY_DN22470_c0_g1_i4_2,<br>TRINITY_DN25579_c0_g1_i7_6,<br>TRINITY_DN22255_c0_g2_i20_1,<br>TRINITY_DN21482_c0_g1_i3_3 |
| 00400 Phenylalanine, tyrosine and tryptophan biosynthesis | A09100 Metabolism | 7 | 0.04543  | 0.770524 | TRINITY_DN22555_c0_g2_i7_3,<br>TRINITY_DN23869_c1_g1_i9_2,<br>TRINITY_DN23809_c0_g4_i8_3,<br>TRINITY_DN22470_c0_g1_i4_2,<br>TRINITY_DN25579_c0_g1_i7_6,                                                               |

|                                  |                        |   |          |         |                                                                                         |
|----------------------------------|------------------------|---|----------|---------|-----------------------------------------------------------------------------------------|
|                                  |                        |   |          |         | TRINITY_DN22255_c0_g2_i20_1,<br>TRINITY_DN21482_c0_g1_i3_3                              |
| 00600 Sphingolipid<br>metabolism | A09100 Metabo-<br>lism | 3 | 0.043074 | 0.79482 | TRINITY_DN8538_c0_g1_i2_2,<br>TRINITY_DN23416_c0_g1_i9_3,<br>TRINITY_DN21684_c0_g1_i3_3 |
